# Supplementary material
Source: PubMed Central journal article supplement (PMC8456390)
Supplement: jama-e2113355-s003.pdf [file jama-e2113355-s003.pdf]

\*Indicates required information. Only first name, last name, and suffix will appear in PubMed.

| Group Name(s):* The PROSPECT Investigators and the Canadian Critical Care Trials Group members |              |                       |                  |                                                            |                                           |                                                         |                                                                                            |
|------------------------------------------------------------------------------------------------|--------------|-----------------------|------------------|------------------------------------------------------------|-------------------------------------------|---------------------------------------------------------|--------------------------------------------------------------------------------------------|
| *First Name and Middle Initial(s)                                                              | *Last Name   | *Suffix (eg, Jr, III) | Academic Degrees | Institution                                                | Location (city, state/province, country)  | Role or Contribution, eg, chair, principal investigator | Group (if more than 1 Group listed in the byline) and/or Subgroup (eg, Steering Committee) |
| Christine                                                                                      | Wallace      |                       | BSc(Pharm), RPh  | St. Joseph's Healthcare                                    | Hamilton, Ontario, Canada                 | Pharmacy                                                | Pharmacy Consultant                                                                        |
| Gita                                                                                           | Sobhi        |                       | BSc(Pharm)       | Hamilton Health Science Center                             | Hamilton, Ontario, Canada                 | Pharmacy                                                | Pharmacy Consultant                                                                        |
| Jennie                                                                                         | Johnstone    |                       | MD, PhD          | St. Joseph's Health Center                                 | Toronto, Ontario, Canada                  | Adjudicator                                             | Pneumonia and other Infection Adjudication Committee                                       |
| François                                                                                       | Lauzier      |                       | MD, MSc, FRCPC   | CHU de Québec-Université Laval (Hôpital de l'Enfant-Jésus) | Québec City, Quebec, Canada               | Adjudicator                                             | Pneumonia and other Infection Adjudication Committee                                       |
| Deborah                                                                                        | Cook         |                       | MD               | St. Joseph's Healthcare                                    | Hamilton, Ontario, Canada                 | Adjudicator                                             | Pneumonia and other Infection Adjudication Committee                                       |
| Erick                                                                                          | Duan         |                       | MD, MSc          | Niagara Health                                             | St. Catharines, Ontario, Canada           | Adjudicator                                             | Pneumonia and other Infection Adjudication Committee                                       |
| Joanna                                                                                         | Dionne       |                       | MD, MSc          | Jurvinski Hospital                                         | Hamilton, Ontario, Canada                 | Adjudicator                                             | Pneumonia and other Infection Adjudication Committee                                       |
| Bram                                                                                           | Rochweg      |                       | MD               | Jurvinski Hospital                                         | Hamilton, Ontario, Canada                 | Adjudicator                                             | Pneumonia and other Infection Adjudication Committee                                       |
| John                                                                                           | Centoanti    |                       | MD               | Hamilton General Hospital                                  | Hamilton, Ontario, Canada                 | Adjudicator                                             | Pneumonia and other Infection Adjudication Committee                                       |
| Simon                                                                                          | Oczkowski    |                       | MD               | McMaster University                                        | Hamilton, Ontario, Canada                 | Adjudicator                                             | Pneumonia and other Infection Adjudication Committee                                       |
| Joanna                                                                                         | Dionne       |                       | MD, MSc          | Jurvinski Hospital                                         | Hamilton, Ontario, Canada                 | Adjudicator                                             | Clostridioides Difficile Infection Adjudication Committee                                  |
| Erick                                                                                          | Duan         |                       | MD, MSc          | Niagara Health                                             | St. Catharines, Ontario, Canada           | Adjudicator                                             | Clostridioides Difficile Infection Adjudication Committee                                  |
| Jennie                                                                                         | Johnstone    |                       | MD, PhD          | St. Joseph's Health Center                                 | Toronto, Ontario, Canada                  | Adjudicator                                             | Clostridioides Difficile Infection Adjudication Committee                                  |
| Daphne                                                                                         | Lamarche     |                       | PhD              | McMaster University                                        | Hamilton, Ontario, Canada                 | Centralized Laboratory                                  | Translational Science Committee                                                            |
| Michael                                                                                        | Surette      |                       | PhD              | McMaster University                                        | Hamilton, Ontario, Canada                 | Centralized Laboratory                                  | Translational Science Committee                                                            |
| Dawn                                                                                           | Bowdish      |                       | PhD              | McMaster University                                        | Hamilton, Ontario, Canada                 | Centralized Laboratory                                  | Translational Science Committee                                                            |
| Andreas                                                                                        | Laupacis     |                       | MD, MSc, BA      | University of Toronto, St. Michael's Hospital              | Toronto, Ontario, Canada                  | Data Monitoring Committee                               | Data Monitoring Committee (Lead)                                                           |
| Robin                                                                                          | Roberts      |                       | PhD              | McMaster University                                        | Hamilton, Ontario, Canada                 | Data Monitoring Committee                               | Data Monitoring Committee                                                                  |
| Christian                                                                                      | Brun-Buisson |                       | MD               | Université Paris Est Créteil                               | Paris, France                             | Data Monitoring Committee                               | Data Monitoring Committee                                                                  |
| Steve                                                                                          | Reynolds     |                       | MD               | Royal Columbia Hospital                                    | New Westminster, British Columbia, Canada | Site Investigator                                       |                                                                                            |
| Sue                                                                                            | Willems      |                       | BScN, CCRP       | Royal Columbia Hospital                                    | New Westminster, British Columbia, Canada | Research Coordinator                                    |                                                                                            |
| Tina                                                                                           | Sekhon       |                       | BSc(Pharm)       | Royal Columbia Hospital                                    | New Westminster, British Columbia, Canada | Pharmacy                                                |                                                                                            |
| Peter                                                                                          | Dodek        |                       | MD, MHSc         | St. Paul's Hospital                                        | Vancouver, British Columbia, Canada       | Site Investigator                                       |                                                                                            |
| Najib                                                                                          | Ayas         |                       | MD               | St. Paul's Hospital                                        | Vancouver, British Columbia, Canada       | Site Co-Investigator                                    |                                                                                            |
| Maria                                                                                          | Agda         |                       | BSc              | St. Paul's Hospital                                        | Vancouver, British Columbia, Canada       | Research Coordinator                                    |                                                                                            |
| Victoria                                                                                       | Alcuaz       |                       | BScN             | St. Paul's Hospital                                        | Vancouver, British Columbia, Canada       | Research Coordinator                                    |                                                                                            |
| Betty-Jean                                                                                     | Ashley       |                       | RN               | St. Paul's Hospital                                        | Vancouver, British Columbia, Canada       | Research Coordinator                                    |                                                                                            |
| Kelsey                                                                                         | Brewer       |                       |                  | St. Paul's Hospital                                        | Vancouver, British Columbia, Canada       | Research Coordinator                                    |                                                                                            |
| Janice                                                                                         | Palmer       |                       | BScN             | St. Paul's Hospital                                        | Vancouver, British Columbia, Canada       | Research Coordinator                                    |                                                                                            |
| Glen                                                                                           | Brown        |                       | PharmD           | St. Paul's Hospital                                        | Vancouver, British Columbia, Canada       | Pharmacy                                                |                                                                                            |
| Mara                                                                                           | Pavan        |                       | BSc(Pharm)       | St. Paul's Hospital                                        | Vancouver, British Columbia, Canada       | Pharmacy                                                |                                                                                            |
| William                                                                                        | Henderson    |                       | MD               | Vancouver General Hospital                                 | Vancouver, British Columbia, Canada       | Site Investigator                                       |                                                                                            |
| Donald                                                                                         | Greisdale    |                       | MD, MPH          | Vancouver General Hospital                                 | Vancouver, British Columbia, Canada       | Site Co-Investigator                                    |                                                                                            |
| Mypinder                                                                                       | Sekhon       |                       | MD, PhD          | Vancouver General Hospital                                 | Vancouver, British Columbia, Canada       | Site Co-Investigator                                    |                                                                                            |
| Denise                                                                                         | Foster       |                       | RN               | Vancouver General Hospital                                 | Vancouver, British Columbia, Canada       | Research Coordinator                                    |                                                                                            |
| Suzie                                                                                          | Logie        |                       | CCRN, CCRP       | Vancouver General Hospital                                 | Vancouver, British Columbia, Canada       | Research Coordinator                                    |                                                                                            |
| Judy                                                                                           | Yip          |                       | BSc(Pharm)       | Vancouver General Hospital                                 | Vancouver, British Columbia, Canada       | Pharmacy                                                |                                                                                            |
| Gordon                                                                                         | Wood         |                       | MD, FRCPC        | Vancouver Island Health Authority                          | Victoria, British Columbia, Canada        | Site Investigator                                       |                                                                                            |
| Daniel                                                                                         | Ovakim       |                       | MD, MSc, FRCPC   | Vancouver Island Health Authority                          | Victoria, British Columbia, Canada        | Site Co-Investigator                                    |                                                                                            |
| Fiona                                                                                          | Auld         |                       | BScN, CCRP       | Vancouver Island Health Authority                          | Victoria, British Columbia, Canada        | Research Coordinator                                    |                                                                                            |
| Gayle                                                                                          | Carney       |                       | BScN, CCRN       | Vancouver Island Health Authority                          | Victoria, British Columbia, Canada        | Research Coordinator                                    |                                                                                            |
| Ralph                                                                                          | Fleming      |                       |                  | Vancouver Island Health Authority                          | Victoria, British Columbia, Canada        | Research Coordinator                                    |                                                                                            |
| Jennifer                                                                                       | Good         |                       | BScN             | Vancouver Island Health Authority                          | Victoria, British Columbia, Canada        | Research Coordinator                                    |                                                                                            |
| Mandeep                                                                                        | Manhas       |                       | MBBS, MSc, CCRP  | Vancouver Island Health Authority                          | Victoria, British Columbia, Canada        | Research Coordinator                                    |                                                                                            |
| Karin                                                                                          | Boyd         |                       |                  | Vancouver Island Health Authority                          | Victoria, British Columbia, Canada        | Pharmacy                                                |                                                                                            |
| Jane                                                                                           | Dheere       |                       | BSc(Pharm)       | Vancouver Island Health Authority                          | Victoria, British Columbia, Canada        | Pharmacy                                                |                                                                                            |
| Tom                                                                                            | Stelfox      |                       | MD               | Foothills Hospital, Univeristy of Calgary                  | Calgary, Alberta, Canada                  | Site Investigator                                       |                                                                                            |
| Philippe                                                                                       | Couillard    |                       | MD               | Foothills Hospital, Univeristy of Calgary                  | Calgary, Alberta, Canada                  | Site Co-Investigator                                    |                                                                                            |
| Christopher                                                                                    | Doig         |                       | MD               | Foothills Hospital, Univeristy of Calgary                  | Calgary, Alberta, Canada                  | Site Co-Investigator                                    |                                                                                            |
| Ken                                                                                            | Parhar       |                       | MD               | Foothills Hospital, Univeristy of Calgary                  | Calgary, Alberta, Canada                  | Site Co-Investigator                                    |                                                                                            |
| Joshua                                                                                         | Booth        |                       | BA               | Foothills Hospital, Univeristy of Calgary                  | Calgary, Alberta, Canada                  | Research Coordinator                                    |                                                                                            |
| Cassidy                                                                                        | Codan        |                       | BSc              | Foothills Hospital, Univeristy of Calgary                  | Calgary, Alberta, Canada                  | Research Coordinator                                    |                                                                                            |
| Stacy                                                                                          | Ruddell      |                       | MSc              | Foothills Hospital, Univeristy of Calgary                  | Calgary, Alberta, Canada                  | Research Coordinator                                    |                                                                                            |
| Candice                                                                                        | Cameron      |                       | BSP              | Foothills Hospital, Univeristy of Calgary                  | Calgary, Alberta, Canada                  | Pharmacy                                                |                                                                                            |
| Rhonda                                                                                         | Edison       |                       | RPhT             | Foothills Hospital, Univeristy of Calgary                  | Calgary, Alberta, Canada                  | Pharmacy                                                |                                                                                            |

\*Indicates required information. Only first name, last name, and suffix will appear in PubMed.

| *First Name and Middle Initial(s) | *Last Name      | *Suffix (eg, Jr, III) | Academic Degrees   | Institution                                  | Location (city, state/province, country) | Role or Contribution, eg, chair, principal investigator | Group (if more than 1 Group listed in the byline) and/or Subgroup (eg, Steering Committee) |
|-----------------------------------|-----------------|-----------------------|--------------------|----------------------------------------------|------------------------------------------|---------------------------------------------------------|--------------------------------------------------------------------------------------------|
| Anne                              | Martin          |                       | RPhT               | Foothills Hospital, Univeristy of Calgary    | Calgary, Alberta, Canada                 | Pharmacy                                                |                                                                                            |
| Breanna                           | Mina            |                       | RPhT               | Foothills Hospital, Univeristy of Calgary    | Calgary, Alberta, Canada                 | Pharmacy                                                |                                                                                            |
| Daniel                            | Niven           |                       | MD                 | Peter Lougheed Center, University of Calgary | Calgary, Alberta, Canada                 | Site Investigator                                       |                                                                                            |
| Luc                               | Berthiaume      |                       | MD                 | Peter Lougheed Center, University of Calgary | Calgary, Alberta, Canada                 | Site Co-Investigator                                    |                                                                                            |
| Jonathan                          | Gaudet          |                       | MD                 | Peter Lougheed Center, University of Calgary | Calgary, Alberta, Canada                 | Site Co-Investigator                                    |                                                                                            |
| Joshua                            | Booth           |                       | BA                 | Peter Lougheed Center, University of Calgary | Calgary, Alberta, Canada                 | Research Coordinator                                    |                                                                                            |
| Cassidy                           | Codan           |                       | BSc                | Peter Lougheed Center, University of Calgary | Calgary, Alberta, Canada                 | Research Coordinator                                    |                                                                                            |
| Stacy                             | Ruddell         |                       | MSc                | Peter Lougheed Center, University of Calgary | Calgary, Alberta, Canada                 | Research Coordinator                                    |                                                                                            |
| Candice                           | Cameron         |                       | BSP                | Peter Lougheed Center, University of Calgary | Calgary, Alberta, Canada                 | Pharmacy                                                |                                                                                            |
| Rhonda                            | Edison          |                       | RPhT               | Peter Lougheed Center, University of Calgary | Calgary, Alberta, Canada                 | Pharmacy                                                |                                                                                            |
| Anne                              | Martin          |                       | RPhT               | Peter Lougheed Center, University of Calgary | Calgary, Alberta, Canada                 | Pharmacy                                                |                                                                                            |
| Breanna                           | Mina            |                       | RPhT               | Peter Lougheed Center, University of Calgary | Calgary, Alberta, Canada                 | Pharmacy                                                |                                                                                            |
| Jim                               | Kutsiogiannis   |                       | MD, MHSc, FRCPC    | Royal Alexandra Hospital                     | Edmonton, Alberta, Canada                | Site Investigator                                       |                                                                                            |
| Raiyan                            | Chowdhury       |                       | MD, MHSc, FRCPC    | Royal Alexandra Hospital                     | Edmonton, Alberta, Canada                | Site Co-Investigator                                    |                                                                                            |
| Jon                               | Davidow         |                       | MD, FRCPC          | Royal Alexandra Hospital                     | Edmonton, Alberta, Canada                | Site Co-Investigator                                    |                                                                                            |
| Curt                              | Johnston        |                       | MD, FRCPC          | Royal Alexandra Hospital                     | Edmonton, Alberta, Canada                | Site Co-Investigator                                    |                                                                                            |
| Richard                           | Johnston        |                       | MD, MBA            | Royal Alexandra Hospital                     | Edmonton, Alberta, Canada                | Site Co-Investigator                                    |                                                                                            |
| Kim                               | Macala          |                       | MD, FRCPC, PhD     | Royal Alexandra Hospital                     | Edmonton, Alberta, Canada                | Site Co-Investigator                                    |                                                                                            |
| Sam                               | Marcushamer     |                       | MD, FRCPC          | Royal Alexandra Hospital                     | Edmonton, Alberta, Canada                | Site Co-Investigator                                    |                                                                                            |
| Darren                            | Markland        |                       | MD, FRCPC          | Royal Alexandra Hospital                     | Edmonton, Alberta, Canada                | Site Co-Investigator                                    |                                                                                            |
| Doug                              | Matheson        |                       | MD, FRCPC          | Royal Alexandra Hospital                     | Edmonton, Alberta, Canada                | Site Co-Investigator                                    |                                                                                            |
| Damian                            | Payton-Gay      |                       | MD, FRCPC          | Royal Alexandra Hospital                     | Edmonton, Alberta, Canada                | Site Co-Investigator                                    |                                                                                            |
| David                             | Zygun           |                       | MD, FRCPC, MSc, MH | Royal Alexandra Hospital                     | Edmonton, Alberta, Canada                | Site Co-Investigator                                    |                                                                                            |
| Tayne                             | Hewer           |                       | MSc                | Royal Alexandra Hospital                     | Edmonton, Alberta, Canada                | Research Coordinator                                    |                                                                                            |
| Pat                               | Thompson        |                       | RN                 | Royal Alexandra Hospital                     | Edmonton, Alberta, Canada                | Research Coordinator                                    |                                                                                            |
| Maggie                            | Ge              |                       | RPhT               | Royal Alexandra Hospital                     | Edmonton, Alberta, Canada                | Pharmacy                                                |                                                                                            |
| Janny                             | Hall            |                       | RPhT               | Royal Alexandra Hospital                     | Edmonton, Alberta, Canada                | Pharmacy                                                |                                                                                            |
| Sharon                            | Matenchuk       |                       | BSc(Pharm), RPh    | Royal Alexandra Hospital                     | Edmonton, Alberta, Canada                | Pharmacy                                                |                                                                                            |
| Wendy                             | Sligl           |                       | MD, MSc, FRCPC     | University of Edmonton Hospital              | Edmonton, Alberta, Canada                | Site Investigator                                       |                                                                                            |
| Sean                              | Bagshaw         |                       | MD, MSc, FRCPC     | University of Edmonton Hospital              | Edmonton, Alberta, Canada                | Site Co-Investigator                                    |                                                                                            |
| Nadia                             | Baig            |                       | BSc                | University of Edmonton Hospital              | Edmonton, Alberta, Canada                | Research Coordinator                                    |                                                                                            |
| Lorena                            | McCoshen        |                       | GN                 | University of Edmonton Hospital              | Edmonton, Alberta, Canada                | Research Coordinator                                    |                                                                                            |
| Katrina                           | Alexandropoulos |                       | RPhT               | University of Edmonton Hospital              | Edmonton, Alberta, Canada                | Pharmacy                                                |                                                                                            |
| Sherri                            | Bain            |                       | BSc(Pharm)         | University of Edmonton Hospital              | Edmonton, Alberta, Canada                | Pharmacy                                                |                                                                                            |
| Michelle                          | Brandt          |                       | BSc(Pharm)         | University of Edmonton Hospital              | Edmonton, Alberta, Canada                | Pharmacy                                                |                                                                                            |
| Cathy                             | Constable       |                       | RPhT               | University of Edmonton Hospital              | Edmonton, Alberta, Canada                | Pharmacy                                                |                                                                                            |
| Kari                              | Douglas         |                       | RPhT               | University of Edmonton Hospital              | Edmonton, Alberta, Canada                | Pharmacy                                                |                                                                                            |
| Shaleen                           | Maharaj         |                       | RPhT               | University of Edmonton Hospital              | Edmonton, Alberta, Canada                | Pharmacy                                                |                                                                                            |
| Sabrina                           | Travers         |                       | RPhT               | University of Edmonton Hospital              | Edmonton, Alberta, Canada                | Pharmacy                                                |                                                                                            |
| Ryan                              | Zarychanski     |                       | MD                 | Health Science Center                        | Winnipeg, Manitoba, Canada               | Site Investigator                                       |                                                                                            |
| Bojan                             | Paunovic        |                       | MD                 | Health Science Center                        | Winnipeg, Manitoba, Canada               | Site Co-Investigator                                    |                                                                                            |
| Justin                            | Lys             |                       | MD                 | Health Science Center                        | Winnipeg, Manitoba, Canada               | Research Coordinator                                    |                                                                                            |
| Nicole                            | Marten          |                       | RN                 | Health Science Center                        | Winnipeg, Manitoba, Canada               | Research Coordinator                                    |                                                                                            |
| Audrey                            | Bhairo          |                       |                    | Health Science Center                        | Winnipeg, Manitoba, Canada               | Pharmacy                                                |                                                                                            |
| Halyna                            | Ferenes         |                       | RPEBC-PT           | Health Science Center                        | Winnipeg, Manitoba, Canada               | Pharmacy                                                |                                                                                            |
| Beata                             | Kozak           |                       | BSc                | Health Science Center                        | Winnipeg, Manitoba, Canada               | Pharmacy                                                |                                                                                            |
| Debra                             | Verrier         |                       | PA                 | Health Science Center                        | Winnipeg, Manitoba, Canada               | Pharmacy                                                |                                                                                            |
| Dawn-Lee                          | McLaughlin      |                       | PA                 | Health Science Center                        | Winnipeg, Manitoba, Canada               | Pharmacy                                                |                                                                                            |
| Maria                             | Valente         |                       | PA                 | Health Science Center                        | Winnipeg, Manitoba, Canada               | Pharmacy                                                |                                                                                            |
| Bojan                             | Paunovic        |                       | MD                 | St. Boniface Hospital                        | Winnipeg, Manitoba, Canada               | Site Investigator                                       |                                                                                            |
| Ryan                              | Zarychanski     |                       | MD                 | St. Boniface Hospital                        | Winnipeg, Manitoba, Canada               | Site Co-Investigator                                    |                                                                                            |
| Marcus                            | Blouw           |                       | MD                 | St. Boniface Hospital                        | Winnipeg, Manitoba, Canada               | Site Co-Investigator                                    |                                                                                            |
| Kendiss                           | Olafson         |                       | MD                 | St. Boniface Hospital                        | Winnipeg, Manitoba, Canada               | Site Co-Investigator                                    |                                                                                            |
| Heather                           | Smith           |                       | MD                 | St. Boniface Hospital                        | Winnipeg, Manitoba, Canada               | Site Co-Investigator                                    |                                                                                            |
| Oliver                            | Gutieror        |                       | MD                 | St. Boniface Hospital                        | Winnipeg, Manitoba, Canada               | Research Coordinator                                    |                                                                                            |
| Justin                            | Lys             |                       | MD                 | St. Boniface Hospital                        | Winnipeg, Manitoba, Canada               | Research Coordinator                                    |                                                                                            |

\*Indicates required information. Only first name, last name, and suffix will appear in PubMed.

| *First Name and Middle Initial(s) | *Last Name      | *Suffix (eg, Jr, III) | Academic Degrees  | Institution                | Location (city, state/province, country) | Role or Contribution, eg, chair, principal investigator | Group (if more than 1 Group listed in the byline) and/or Subgroup (eg, Steering Committee) |
|-----------------------------------|-----------------|-----------------------|-------------------|----------------------------|------------------------------------------|---------------------------------------------------------|--------------------------------------------------------------------------------------------|
| Nicole                            | Marten          |                       | RN                | St. Boniface Hospital      | Winnipeg, Manitoba, Canada               | Research Coordinator                                    |                                                                                            |
| Sherri Lynn                       | Wingfield       |                       | BA                | St. Boniface Hospital      | Winnipeg, Manitoba, Canada               | Research Coordinator                                    |                                                                                            |
| Marnie                            | Boyle           |                       | BSc(Pharm)        | St. Boniface Hospital      | Winnipeg, Manitoba, Canada               | Pharmacy                                                |                                                                                            |
| Halyna                            | Ferenes         |                       | BSc(Pharm)        | St. Boniface Hospital      | Winnipeg, Manitoba, Canada               | Pharmacy                                                |                                                                                            |
| Debbie                            | Hrabi           |                       | RPEBC-PT          | St. Boniface Hospital      | Winnipeg, Manitoba, Canada               | Pharmacy                                                |                                                                                            |
| Beata                             | Kozak           |                       | BSc(Pharm)        | St. Boniface Hospital      | Winnipeg, Manitoba, Canada               | Pharmacy                                                |                                                                                            |
| Chantal                           | MacDonald       |                       | RPEBC-PT          | St. Boniface Hospital      | Winnipeg, Manitoba, Canada               | Pharmacy                                                |                                                                                            |
| Brenda                            | Reeve           |                       | MD, FRCPC         | Brantford General Hospital | Brantford, Ontario Canada                | Site Investigator                                       |                                                                                            |
| Karen                             | Bento           |                       | BScN              | Brantford General Hospital | Brantford, Ontario Canada                | Research Coordinator                                    |                                                                                            |
| Megan                             | Davis           |                       | BSc               | Brantford General Hospital | Brantford, Ontario Canada                | Research Coordinator                                    |                                                                                            |
| William                           | Dechert         |                       | MSc               | Brantford General Hospital | Brantford, Ontario Canada                | Research Coordinator                                    |                                                                                            |
| Barbara                           | Longo           |                       | BScN              | Brantford General Hospital | Brantford, Ontario Canada                | Research Coordinator                                    |                                                                                            |
| Courtney                          | Mullen          |                       | HBSc              | Brantford General Hospital | Brantford, Ontario Canada                | Research Coordinator                                    |                                                                                            |
| Elysia                            | Skrzpek         |                       | BScN              | Brantford General Hospital | Brantford, Ontario Canada                | Research Coordinator                                    |                                                                                            |
| Laurenne                          | Wierenga        |                       | BScN              | Brantford General Hospital | Brantford, Ontario Canada                | Research Coordinator                                    |                                                                                            |
| Wesam                             | Abuzaiter       |                       | BSc(Pharm)        | Brantford General Hospital | Brantford, Ontario Canada                | Pharmacy                                                |                                                                                            |
| Lynda                             | Amorim          |                       | RPhT              | Brantford General Hospital | Brantford, Ontario Canada                | Pharmacy                                                |                                                                                            |
| Rosemarie                         | Bauer           |                       | RPhT              | Brantford General Hospital | Brantford, Ontario Canada                | Pharmacy                                                |                                                                                            |
| Rachel                            | Damota          |                       | RPhT              | Brantford General Hospital | Brantford, Ontario Canada                | Pharmacy                                                |                                                                                            |
| Hoang                             | Thoa Ho         |                       | PharmD            | Brantford General Hospital | Brantford, Ontario Canada                | Pharmacy                                                |                                                                                            |
| Nicole                            | Macdougall      |                       | RPhT              | Brantford General Hospital | Brantford, Ontario Canada                | Pharmacy                                                |                                                                                            |
| Mary                              | Thornewell      |                       | BSc(Pharm), ACPR  | Brantford General Hospital | Brantford, Ontario Canada                | Pharmacy                                                |                                                                                            |
| Lara                              | Tran            |                       | BSc(Pharm)        | Brantford General Hospital | Brantford, Ontario Canada                | Pharmacy                                                |                                                                                            |
| Jennifer                          | Visocchi        |                       | BSC(Pharm), ACPR  | Brantford General Hospital | Brantford, Ontario Canada                | Pharmacy                                                |                                                                                            |
| Paul                              | Hosek           |                       | MD, FRCPC         | Grand River Hospital       | Kitchener, Ontario, Canada               | Site Investigator                                       |                                                                                            |
| Bill                              | Plaxton         |                       | MD, FRCPC         | Grand River Hospital       | Kitchener, Ontario, Canada               | Site Co-Investigator                                    |                                                                                            |
| Catherine                         | Armstong        |                       | BScN              | Grand River Hospital       | Kitchener, Ontario, Canada               | Research Coordinator                                    |                                                                                            |
| William                           | Dechert         |                       | MSc               | Grand River Hospital       | Kitchener, Ontario, Canada               | Research Coordinator                                    |                                                                                            |
| Janelle                           | Ellis           |                       | BScN              | Grand River Hospital       | Kitchener, Ontario, Canada               | Research Coordinator                                    |                                                                                            |
| Kayla                             | Fisk            |                       | BScN              | Grand River Hospital       | Kitchener, Ontario, Canada               | Research Coordinator                                    |                                                                                            |
| Melissa                           | Gabnouri        |                       | RN                | Grand River Hospital       | Kitchener, Ontario, Canada               | Research Coordinator                                    |                                                                                            |
| Emilie                            | Gordon          |                       | BScN              | Grand River Hospital       | Kitchener, Ontario, Canada               | Research Coordinator                                    |                                                                                            |
| Rebecca                           | Haegens         |                       |                   | Grand River Hospital       | Kitchener, Ontario, Canada               | Research Coordinator                                    |                                                                                            |
| Lisa                              | Halford         |                       | BASc              | Grand River Hospital       | Kitchener, Ontario, Canada               | Research Coordinator                                    |                                                                                            |
| Brooklyn                          | Hillis          |                       | BScN              | Grand River Hospital       | Kitchener, Ontario, Canada               | Research Coordinator                                    |                                                                                            |
| Rebecca                           | Jesso           |                       | MScN, MN, NP      | Grand River Hospital       | Kitchener, Ontario, Canada               | Research Coordinator                                    |                                                                                            |
| Jennifer                          | McLaren         |                       | BScN, RN, CNCC(C) | Grand River Hospital       | Kitchener, Ontario, Canada               | Research Coordinator                                    |                                                                                            |
| Elliot                            | McMillan        |                       | PhD               | Grand River Hospital       | Kitchener, Ontario, Canada               | Research Coordinator                                    |                                                                                            |
| Mariska                           | Pelkmans        |                       | BScN              | Grand River Hospital       | Kitchener, Ontario, Canada               | Research Coordinator                                    |                                                                                            |
| Matthew                           | Rekman          |                       | BScN              | Grand River Hospital       | Kitchener, Ontario, Canada               | Research Coordinator                                    |                                                                                            |
| Sylvia                            | Sinkovitis      |                       | BScN              | Grand River Hospital       | Kitchener, Ontario, Canada               | Research Coordinator                                    |                                                                                            |
| Monica                            | Truong          |                       | BScN              | Grand River Hospital       | Kitchener, Ontario, Canada               | Research Coordinator                                    |                                                                                            |
| Michelle                          | White           |                       | BSN, MN           | Grand River Hospital       | Kitchener, Ontario, Canada               | Research Coordinator                                    |                                                                                            |
| Noah                              | Bates           |                       | BSc-RPh           | Grand River Hospital       | Kitchener, Ontario, Canada               | Pharmacy                                                |                                                                                            |
| Susan                             | Bryden-Cromwell |                       | BSc-RPh           | Grand River Hospital       | Kitchener, Ontario, Canada               | Pharmacy                                                |                                                                                            |
| Colleen                           | Cameron         |                       | PharmD            | Grand River Hospital       | Kitchener, Ontario, Canada               | Pharmacy                                                |                                                                                            |
| Aminah                            | Deen            |                       | DipPharmT         | Grand River Hospital       | Kitchener, Ontario, Canada               | Pharmacy                                                |                                                                                            |
| Sheri                             | DiGiovanni      |                       | BSc-RPh           | Grand River Hospital       | Kitchener, Ontario, Canada               | Pharmacy                                                |                                                                                            |
| Anders                            | Foss            |                       | BSc-RPh           | Grand River Hospital       | Kitchener, Ontario, Canada               | Pharmacy                                                |                                                                                            |
| Esther                            | Lee             |                       | BSc-RPh           | Grand River Hospital       | Kitchener, Ontario, Canada               | Pharmacy                                                |                                                                                            |
| Heidi                             | MacGregor       |                       | DipPharmT         | Grand River Hospital       | Kitchener, Ontario, Canada               | Pharmacy                                                |                                                                                            |
| Esther                            | Galbraith       |                       | BSC(Pharm)        | Grand River Hospital       | Kitchener, Ontario, Canada               | Pharmacy                                                |                                                                                            |
| Robyn                             | McArthur        |                       | PharmD            | Grand River Hospital       | Kitchener, Ontario, Canada               | Pharmacy                                                |                                                                                            |
| Julie                             | McGregor        |                       | DipPharmT         | Grand River Hospital       | Kitchener, Ontario, Canada               | Pharmacy                                                |                                                                                            |
| Keith                             | Miller          |                       | BSc-RPh           | Grand River Hospital       | Kitchener, Ontario, Canada               | Pharmacy                                                |                                                                                            |
| Sharon                            | Morris          |                       | DipPharmT         | Grand River Hospital       | Kitchener, Ontario, Canada               | Pharmacy                                                |                                                                                            |

\*Indicates required information. Only first name, last name, and suffix will appear in PubMed.

| *First Name and Middle Initial(s) | *Last Name  | *Suffix (eg, Jr, III) | Academic Degrees  | Institution                                        | Location (city, state/province, country) | Role or Contribution, eg, chair, principal investigator | Group (if more than 1 Group listed in the byline) and/or Subgroup (eg, Steering Committee) |
|-----------------------------------|-------------|-----------------------|-------------------|----------------------------------------------------|------------------------------------------|---------------------------------------------------------|--------------------------------------------------------------------------------------------|
| Shelley                           | Parker      |                       | BSc(Pharm), RPh   | Grand River Hospital                               | Kitchener, Ontario, Canada               | Pharmacy                                                |                                                                                            |
| Candice                           | Smith       |                       | BSc-RPh           | Grand River Hospital                               | Kitchener, Ontario, Canada               | Pharmacy                                                |                                                                                            |
| Joanna                            | Stoglow     |                       | DipBA             | Grand River Hospital                               | Kitchener, Ontario, Canada               | Pharmacy                                                |                                                                                            |
| Jennifer                          | Tung        |                       | PharmD            | Grand River Hospital                               | Kitchener, Ontario, Canada               | Pharmacy                                                |                                                                                            |
| Melissa                           | Vos         |                       | BSc(Pharm)        | Grand River Hospital                               | Kitchener, Ontario, Canada               | Pharmacy                                                |                                                                                            |
| Maureen                           | Meade       |                       | MD, MSc           | Hamilton General Hospital                          | Hamilton, Ontario, Canada                | Site Investigator                                       |                                                                                            |
| Emilie                            | Belley-Cote |                       | MD, PhD           | Hamilton General Hospital                          | Hamilton, Ontario, Canada                | Site Co-Investigator                                    |                                                                                            |
| Lori                              | Hand        |                       | RRT               | Hamilton General Hospital                          | Hamilton, Ontario, Canada                | Research Coordinator                                    |                                                                                            |
| Lisa                              | Klotz       |                       | BSc               | Hamilton General Hospital                          | Hamilton, Ontario, Canada                | Research Coordinator                                    |                                                                                            |
| Alexandra                         | Sabev       |                       | BA                | Hamilton General Hospital                          | Hamilton, Ontario, Canada                | Research Coordinator                                    |                                                                                            |
| Nevena                            | Savija      |                       | MSc               | Hamilton General Hospital                          | Hamilton, Ontario, Canada                | Research Coordinator                                    |                                                                                            |
| Paige                             | Guyatt      |                       | BA, BSc           | Hamilton General Hospital                          | Hamilton, Ontario, Canada                | Research Coordinator                                    |                                                                                            |
| Deanna                            | Cosentino   |                       | RPhT              | Hamilton General Hospital                          | Hamilton, Ontario, Canada                | Pharmacy                                                |                                                                                            |
| Diane                             | Lourenco    |                       | RPhT              | Hamilton General Hospital                          | Hamilton, Ontario, Canada                | Pharmacy                                                |                                                                                            |
| Julie                             | Misina      |                       | RPhT              | Hamilton General Hospital                          | Hamilton, Ontario, Canada                | Pharmacy                                                |                                                                                            |
| Gita                              | Sobhi       |                       | BSc(Pharm)        | Hamilton General Hospital                          | Hamilton, Ontario, Canada                | Pharmacy                                                |                                                                                            |
| Paul                              | Lysecki     |                       | MD                | Joseph Brant Hospital                              | Burlington, Ontario, Canada              | Site Investigator                                       |                                                                                            |
| Joseph                            | Berlingieri |                       | MD                | Joseph Brant Hospital                              | Burlington, Ontario, Canada              | Site Co-Investigator                                    |                                                                                            |
| Sameer                            | Shaikh      |                       | MD                | Joseph Brant Hospital                              | Burlington, Ontario, Canada              | Site Co-Investigator                                    |                                                                                            |
| Steven                            | Skitch      |                       | MD, PhD           | Joseph Brant Hospital                              | Burlington, Ontario, Canada              | Site Co-Investigator                                    |                                                                                            |
| Tracy                             | Campbell    |                       | MSc, RD           | Joseph Brant Hospital                              | Burlington, Ontario, Canada              | Research Coordinator                                    |                                                                                            |
| Hala                              | Basheer     |                       | PharmD            | Joseph Brant Hospital                              | Burlington, Ontario, Canada              | Pharmacy                                                |                                                                                            |
| Kathy                             | Bruder      |                       | RPhT              | Joseph Brant Hospital                              | Burlington, Ontario, Canada              | Pharmacy                                                |                                                                                            |
| Jane                              | Cheng       |                       | BSc(Pharm)        | Joseph Brant Hospital                              | Burlington, Ontario, Canada              | Pharmacy                                                |                                                                                            |
| Kaiser                            | Qureshi     |                       | BSc(Pharm). ACPR, | Joseph Brant Hospital                              | Burlington, Ontario, Canada              | Pharmacy                                                |                                                                                            |
| Celeste                           | Infantino   |                       | RPhT              | Joseph Brant Hospital                              | Burlington, Ontario, Canada              | Pharmacy                                                |                                                                                            |
| Timothy                           | Karachi     |                       | MD                | Jurvinski Hospital                                 | Hamilton, Ontario, Canada                | Site Investigator                                       |                                                                                            |
| Bram                              | Rochweg     |                       | MD                | Jurvinski Hospital                                 | Hamilton, Ontario, Canada                | Site Investigator                                       |                                                                                            |
| Mashari                           | Alghuroba   |                       | BSc               | Jurvinski Hospital                                 | Hamilton, Ontario, Canada                | Research Coordinator                                    |                                                                                            |
| Alia                              | Khaled      |                       | BSc               | Jurvinski Hospital                                 | Hamilton, Ontario, Canada                | Research Coordinator                                    |                                                                                            |
| Tina                              | Millen      |                       | RRT               | Jurvinski Hospital                                 | Hamilton, Ontario, Canada                | Research Coordinator                                    |                                                                                            |
| Ryan                              | Vaisler     |                       | MD                | Jurvinski Hospital                                 | Hamilton, Ontario, Canada                | Research Coordinator                                    |                                                                                            |
| Maya                              | Biljan      |                       | RPhT              | Jurvinski Hospital                                 | Hamilton, Ontario, Canada                | Pharmacy                                                |                                                                                            |
| Deane                             | Cosentino   |                       | RPhT              | Jurvinski Hospital                                 | Hamilton, Ontario, Canada                | Pharmacy                                                |                                                                                            |
| Brittany                          | Marriott    |                       | RPhT              | Jurvinski Hospital                                 | Hamilton, Ontario, Canada                | Pharmacy                                                |                                                                                            |
| Gita                              | Sobhi       |                       | MSc               | Jurvinski Hospital                                 | Hamilton, Ontario, Canada                | Pharmacy                                                |                                                                                            |
| John                              | Muscedere   |                       | MD                | Kingston General Hospital                          | Kingston, Ontario, Canada                | Site Investigator                                       |                                                                                            |
| Gordon                            | Boyd        |                       | MD, PhD           | Kingston General Hospital                          | Kingston, Ontario, Canada                | Site Co-Investigator                                    |                                                                                            |
| Christine                         | D`Arsigny   |                       | MD                | Kingston General Hospital                          | Kingston, Ontario, Canada                | Site Co-Investigator                                    |                                                                                            |
| John                              | Drover      |                       | MD                | Kingston General Hospital                          | Kingston, Ontario, Canada                | Site Co-Investigator                                    |                                                                                            |
| Jason                             | Erb         |                       | MD                | Kingston General Hospital                          | Kingston, Ontario, Canada                | Site Co-Investigator                                    |                                                                                            |
| David                             | Maslove     |                       | MD                | Kingston General Hospital                          | Kingston, Ontario, Canada                | Site Co-Investigator                                    |                                                                                            |
| Chris                             | Parker      |                       | MD                | Kingston General Hospital                          | Kingston, Ontario, Canada                | Site Co-Investigator                                    |                                                                                            |
| Stephanie                         | Sibley      |                       | MD                | Kingston General Hospital                          | Kingston, Ontario, Canada                | Site Co-Investigator                                    |                                                                                            |
| Tracy                             | Boyd        |                       | MSc               | Kingston General Hospital                          | Kingston, Ontario, Canada                | Research Coordinator                                    |                                                                                            |
| Ilinca                            | Georgescu   |                       | MSc               | Kingston General Hospital                          | Kingston, Ontario, Canada                | Research Coordinator                                    |                                                                                            |
| Miranda                           | Hunt        |                       | BA                | Kingston General Hospital                          | Kingston, Ontario, Canada                | Research Coordinator                                    |                                                                                            |
| Danielle                          | Muscedere   |                       |                   | Kingston General Hospital                          | Kingston, Ontario, Canada                | Research Coordinator                                    |                                                                                            |
| Cathy                             | Baker       |                       | RPhT              | Kingston General Hospital                          | Kingston, Ontario, Canada                | Pharmacy                                                |                                                                                            |
| Jennifer                          | Engel       |                       | RPhT              | Kingston General Hospital                          | Kingston, Ontario, Canada                | Pharmacy                                                |                                                                                            |
| Jennifer                          | Fleming     |                       | RPhT              | Kingston General Hospital                          | Kingston, Ontario, Canada                | Pharmacy                                                |                                                                                            |
| Lisa                              | Roderick    |                       | RPhT              | Kingston General Hospital                          | Kingston, Ontario, Canada                | Pharmacy                                                |                                                                                            |
| Shelley                           | Silk        |                       | RPhT              | Kingston General Hospital                          | Kingston, Ontario, Canada                | Pharmacy                                                |                                                                                            |
| Marcy                             | Spencer     |                       | RPhT              | Kingston General Hospital                          | Kingston, Ontario, Canada                | Pharmacy                                                |                                                                                            |
| Michelle                          | Tryon       |                       | BSc(Pharm)        | Kingston General Hospital                          | Kingston, Ontario, Canada                | Pharmacy                                                |                                                                                            |
| Dave                              | Nagpal      |                       | MD, MSc           | London Health Science Centre - University Hospital | London, Ontario, Canada                  | Site Investigator                                       |                                                                                            |
| Ian                               | Ball        |                       | MD, MSc           | London Health Science Centre - University Hospital | London, Ontario, Canada                  | Site Co-Investigator                                    |                                                                                            |

\*Indicates required information. Only first name, last name, and suffix will appear in PubMed.

| *First Name and Middle Initial(s) | *Last Name     | *Suffix (eg, Jr, III) | Academic Degrees | Institution                                        | Location (city, state/province, country) | Role or Contribution, eg, chair, principal investigator | Group (if more than 1 Group listed in the byline) and/or Subgroup (eg, Steering Committee) |
|-----------------------------------|----------------|-----------------------|------------------|----------------------------------------------------|------------------------------------------|---------------------------------------------------------|--------------------------------------------------------------------------------------------|
| Michael                           | Sharpe         |                       | MD               | London Health Science Centre - University Hospital | London, Ontario, Canada                  | Site Co-Investigator                                    |                                                                                            |
| Karen J                           | Bosma          |                       | MD               | London Health Science Centre - University Hospital | London, Ontario, Canada                  | Site Co-Investigator                                    |                                                                                            |
| Tracey                            | Bentall        |                       |                  | London Health Science Centre - University Hospital | London, Ontario, Canada                  | Research Coordinator                                    |                                                                                            |
| Jessica                           | Sturt-Smith    |                       |                  | London Health Science Centre - University Hospital | London, Ontario, Canada                  | Research Coordinator                                    |                                                                                            |
| Michelle                          | Alexander      |                       | RPhT             | London Health Science Centre - University Hospital | London, Ontario, Canada                  | Pharmacy                                                |                                                                                            |
| Tammy                             | Ellis          |                       |                  | London Health Science Centre - University Hospital | London, Ontario, Canada                  | Pharmacy                                                |                                                                                            |
| Mindy                             | Muylaert       |                       | RPhT             | London Health Science Centre - University Hospital | London, Ontario, Canada                  | Pharmacy                                                |                                                                                            |
| Cindy                             | Paczkowski     |                       | RPhT             | London Health Science Centre - University Hospital | London, Ontario, Canada                  | Pharmacy                                                |                                                                                            |
| Ian                               | Ball           |                       | MD, MSc          | London Health Science Centre - Victoria Hospital   | London, Ontario, Canada                  | Site Investigator                                       |                                                                                            |
| Eileen                            | Campbell       |                       |                  | London Health Science Centre - Victoria Hospital   | London, Ontario, Canada                  | Research Coordinator                                    |                                                                                            |
| Susie                             | Imervoski      |                       | RRT              | London Health Science Centre - Victoria Hospital   | London, Ontario, Canada                  | Research Coordinator                                    |                                                                                            |
| Athena                            | Ovsenek        |                       | BA               | London Health Science Centre - Victoria Hospital   | London, Ontario, Canada                  | Research Coordinator                                    |                                                                                            |
| Rebecca                           | Rondinelli     |                       |                  | London Health Science Centre - Victoria Hospital   | London, Ontario, Canada                  | Research Coordinator                                    |                                                                                            |
| Teresa                            | Longfield      |                       | RPhT             | London Health Science Centre - Victoria Hospital   | London, Ontario, Canada                  | Pharmacy                                                |                                                                                            |
| Amy                               | Moyer          |                       | RPhT             | London Health Science Centre - Victoria Hospital   | London, Ontario, Canada                  | Pharmacy                                                |                                                                                            |
| Faith                             | Norris         |                       | RPhT             | London Health Science Centre - Victoria Hospital   | London, Ontario, Canada                  | Pharmacy                                                |                                                                                            |
| Janice                            | Sumpton        |                       | RPh              | London Health Science Centre - Victoria Hospital   | London, Ontario, Canada                  | Pharmacy                                                |                                                                                            |
| Karina                            | Teterycz       |                       | RPhT             | London Health Science Centre - Victoria Hospital   | London, Ontario, Canada                  | Pharmacy                                                |                                                                                            |
| Sangeeta                          | Mehta          |                       | MD               | Mount Sinai Hospital                               | Toronto, Ontario, Canada                 | Site Investigator                                       |                                                                                            |
| Stephen                           | Lapinsky       |                       | MD               | Mount Sinai Hospital                               | Toronto, Ontario, Canada                 | Site Co-Investigator                                    |                                                                                            |
| Laveena                           | Munshi         |                       | MD, MSc          | Mount Sinai Hospital                               | Toronto, Ontario, Canada                 | Site Co-Investigator                                    |                                                                                            |
| Maedean                           | Brown          |                       | MMHSc            | Mount Sinai Hospital                               | Toronto, Ontario, Canada                 | Research Coordinator                                    |                                                                                            |
| Brittany                          | Giacomino      |                       | RRT              | Mount Sinai Hospital                               | Toronto, Ontario, Canada                 | Research Coordinator                                    |                                                                                            |
| Marnie                            | Jakab          |                       | MD               | Mount Sinai Hospital                               | Toronto, Ontario, Canada                 | Research Coordinator                                    |                                                                                            |
| Alan                              | Kraguiljac     |                       | MSc              | Mount Sinai Hospital                               | Toronto, Ontario, Canada                 | Research Coordinator                                    |                                                                                            |
| Sumesh                            | Shah           |                       | CCRP             | Mount Sinai Hospital                               | Toronto, Ontario, Canada                 | Research Coordinator                                    |                                                                                            |
| Erik                              | Tamberg        |                       | BSc              | Mount Sinai Hospital                               | Toronto, Ontario, Canada                 | Research Coordinator                                    |                                                                                            |
| Doret                             | Cheng          |                       | PharmD           | Mount Sinai Hospital                               | Toronto, Ontario, Canada                 | Pharmacy                                                |                                                                                            |
| Gagan                             | Grewal         |                       | MSc              | Mount Sinai Hospital                               | Toronto, Ontario, Canada                 | Pharmacy                                                |                                                                                            |
| Andrew                            | Han            |                       | BSc(Pharm)       | Mount Sinai Hospital                               | Toronto, Ontario, Canada                 | Pharmacy                                                |                                                                                            |
| Holly                             | Leung          |                       | MSc              | Mount Sinai Hospital                               | Toronto, Ontario, Canada                 | Pharmacy                                                |                                                                                            |
| Ioanna                            | Mantas         |                       | BSc(Pharm)       | Mount Sinai Hospital                               | Toronto, Ontario, Canada                 | Pharmacy                                                |                                                                                            |
| Hilary                            | Rodrigues      |                       | BSc(Pharm)       | Mount Sinai Hospital                               | Toronto, Ontario, Canada                 | Pharmacy                                                |                                                                                            |
| Andew                             | Wyllie         |                       | PharmD           | Mount Sinai Hospital                               | Toronto, Ontario, Canada                 | Pharmacy                                                |                                                                                            |
| Jennifer LY                       | Tsang          |                       | MD, PhD          | Niagara Health                                     | St. Catharines, Ontario, Canada          | Site Investigator                                       |                                                                                            |
| Erick                             | Duan           |                       | MD, MSc          | Niagara Health                                     | St. Catharines, Ontario, Canada          | Site Co-Investigator                                    |                                                                                            |
| Mercedes                          | Carmargo       |                       | MD, MSc          | Niagara Health                                     | St. Catharines, Ontario, Canada          | Research Coordinator                                    |                                                                                            |
| Beverly                           | Richter        |                       | RN               | Niagara Health                                     | St. Catharines, Ontario, Canada          | Research Coordinator                                    |                                                                                            |
| Rita                              | Caporuscio     |                       | BSc(Pharm)       | Niagara Health                                     | St. Catharines, Ontario, Canada          | Pharmacy                                                |                                                                                            |
| Rachel                            | Kressner Falvo |                       | RPhT             | Niagara Health                                     | St. Catharines, Ontario, Canada          | Pharmacy                                                |                                                                                            |
| Dimitra                           | Fleming        |                       | BSc(Pharm)       | Niagara Health                                     | St. Catharines, Ontario, Canada          | Pharmacy                                                |                                                                                            |
| Carmelina                         | Maxwell        |                       | RPhT             | Niagara Health                                     | St. Catharines, Ontario, Canada          | Pharmacy                                                |                                                                                            |
| Karmen                            | Plantic        |                       | RPhT             | Niagara Health                                     | St. Catharines, Ontario, Canada          | Pharmacy                                                |                                                                                            |
| Lauralyn                          | McIntyre       |                       | MD               | Ottawa Civic Hospital                              | Ottawa, Ontario, Canada                  | Site Investigator                                       |                                                                                            |
| Giuseppe                          | Pagliariello   |                       | MD               | Ottawa Civic Hospital                              | Ottawa, Ontario, Canada                  | Site Co-Investigator                                    |                                                                                            |
| Gianni                            | D`Egidio       |                       | MD               | Ottawa Civic Hospital                              | Ottawa, Ontario, Canada                  | Site Co-Investigator                                    |                                                                                            |
| Shane                             | English        |                       | MD               | Ottawa Civic Hospital                              | Ottawa, Ontario, Canada                  | Site Co-Investigator                                    |                                                                                            |
| Mike                              | Hartwick       |                       | MD               | Ottawa Civic Hospital                              | Ottawa, Ontario, Canada                  | Site Co-Investigator                                    |                                                                                            |
| Jonathan                          | Hooper         |                       | MD               | Ottawa Civic Hospital                              | Ottawa, Ontario, Canada                  | Site Co-Investigator                                    |                                                                                            |
| Dal                               | Kubelik        |                       | MD               | Ottawa Civic Hospital                              | Ottawa, Ontario, Canada                  | Site Co-Investigator                                    |                                                                                            |
| Kwadwo                            | Kyeremanteng   |                       | MD               | Ottawa Civic Hospital                              | Ottawa, Ontario, Canada                  | Site Co-Investigator                                    |                                                                                            |
| Hilary                            | Meggison       |                       | MD               | Ottawa Civic Hospital                              | Ottawa, Ontario, Canada                  | Site Co-Investigator                                    |                                                                                            |
| David                             | Neilipovitz    |                       | MD               | Ottawa Civic Hospital                              | Ottawa, Ontario, Canada                  | Site Co-Investigator                                    |                                                                                            |
| Rakesh                            | Patel          |                       | MD               | Ottawa Civic Hospital                              | Ottawa, Ontario, Canada                  | Site Co-Investigator                                    |                                                                                            |
| Joseph                            | Po             |                       | MD               | Ottawa Civic Hospital                              | Ottawa, Ontario, Canada                  | Site Co-Investigator                                    |                                                                                            |
| Erin                              | Rosenberg      |                       | MD               | Ottawa Civic Hospital                              | Ottawa, Ontario, Canada                  | Site Co-Investigator                                    |                                                                                            |

\*Indicates required information. Only first name, last name, and suffix will appear in PubMed.

| *First Name and Middle Initial(s) | *Last Name   | *Suffix (eg, Jr, III) | Academic Degrees | Institution             | Location (city, state/province, country) | Role or Contribution, eg, chair, principal investigator | Group (if more than 1 Group listed in the byline) and/or Subgroup (eg, Steering Committee) |
|-----------------------------------|--------------|-----------------------|------------------|-------------------------|------------------------------------------|---------------------------------------------------------|--------------------------------------------------------------------------------------------|
| Brigette                          | Gomes        |                       | BScN, RN         | Ottawa Civic Hospital   | Ottawa, Ontario, Canada                  | Research Coordinator                                    |                                                                                            |
| Lianne                            | Leclair      |                       | MScN             | Ottawa Civic Hospital   | Ottawa, Ontario, Canada                  | Research Coordinator                                    |                                                                                            |
| Rebecca                           | Porteous     |                       | BScN, RN         | Ottawa Civic Hospital   | Ottawa, Ontario, Canada                  | Research Coordinator                                    |                                                                                            |
| Shawna                            | Reddie       |                       | BSc              | Ottawa Civic Hospital   | Ottawa, Ontario, Canada                  | Research Coordinator                                    |                                                                                            |
| Irene                             | Watpool      |                       | BScN, RN         | Ottawa Civic Hospital   | Ottawa, Ontario, Canada                  | Research Coordinator                                    |                                                                                            |
| Marianne                          | Cox          |                       |                  | Ottawa Civic Hospital   | Ottawa, Ontario, Canada                  | Pharmacy                                                |                                                                                            |
| Kathy                             | Fraser       |                       |                  | Ottawa Civic Hospital   | Ottawa, Ontario, Canada                  | Pharmacy                                                |                                                                                            |
| Jennifer                          | Kuhn         |                       |                  | Ottawa Civic Hospital   | Ottawa, Ontario, Canada                  | Pharmacy                                                |                                                                                            |
| Rob                               | Macleod      |                       |                  | Ottawa Civic Hospital   | Ottawa, Ontario, Canada                  | Pharmacy                                                |                                                                                            |
| Susanne                           | Richard      |                       |                  | Ottawa Civic Hospital   | Ottawa, Ontario, Canada                  | Pharmacy                                                |                                                                                            |
| Dawn                              | Rose         |                       |                  | Ottawa Civic Hospital   | Ottawa, Ontario, Canada                  | Pharmacy                                                |                                                                                            |
| Sherry                            | Weir         |                       | RPhT             | Ottawa Civic Hospital   | Ottawa, Ontario, Canada                  | Pharmacy                                                |                                                                                            |
| Lauralyn                          | McIntyre     |                       | MD               | Ottawa General Hospital | Ottawa, Ontario, Canada                  | Site Investigator                                       |                                                                                            |
| Pierre                            | Cardinal     |                       | MD               | Ottawa General Hospital | Ottawa, Ontario, Canada                  | Site Co-Investigator                                    |                                                                                            |
| Gianni                            | D'Egidio     |                       | MD               | Ottawa General Hospital | Ottawa, Ontario, Canada                  | Site Co-Investigator                                    |                                                                                            |
| Mike                              | Hartwick     |                       | MD               | Ottawa General Hospital | Ottawa, Ontario, Canada                  | Site Co-Investigator                                    |                                                                                            |
| Gwynne                            | Jones        |                       | MD               | Ottawa General Hospital | Ottawa, Ontario, Canada                  | Site Co-Investigator                                    |                                                                                            |
| John                              | Kim          |                       | MD               | Ottawa General Hospital | Ottawa, Ontario, Canada                  | Site Co-Investigator                                    |                                                                                            |
| Kwadwo                            | Kyeremanteng |                       | MD               | Ottawa General Hospital | Ottawa, Ontario, Canada                  | Site Co-Investigator                                    |                                                                                            |
| Sherissa                          | Microys      |                       | MD               | Ottawa General Hospital | Ottawa, Ontario, Canada                  | Site Co-Investigator                                    |                                                                                            |
| Rakesh                            | Patel        |                       | MD               | Ottawa General Hospital | Ottawa, Ontario, Canada                  | Site Co-Investigator                                    |                                                                                            |
| Erin                              | Rosenberg    |                       | MD               | Ottawa General Hospital | Ottawa, Ontario, Canada                  | Site Co-Investigator                                    |                                                                                            |
| Aimee                             | Sarti        |                       | MD               | Ottawa General Hospital | Ottawa, Ontario, Canada                  | Site Co-Investigator                                    |                                                                                            |
| Andrew                            | Seely        |                       | MD               | Ottawa General Hospital | Ottawa, Ontario, Canada                  | Site Co-Investigator                                    |                                                                                            |
| Shelley                           | Acres        |                       | BScN, RN         | Ottawa General Hospital | Ottawa, Ontario, Canada                  | Research Coordinator                                    |                                                                                            |
| Sydney                            | Mietitis     |                       | BSc              | Ottawa General Hospital | Ottawa, Ontario, Canada                  | Research Coordinator                                    |                                                                                            |
| Kaitlyn                           | Montroy      |                       | MSc              | Ottawa General Hospital | Ottawa, Ontario, Canada                  | Research Coordinator                                    |                                                                                            |
| Rebecca                           | Porteous     |                       | BScN, RN         | Ottawa General Hospital | Ottawa, Ontario, Canada                  | Research Coordinator                                    |                                                                                            |
| Amanda                            | Van Beinum   |                       | MSc              | Ottawa General Hospital | Ottawa, Ontario, Canada                  | Research Coordinator                                    |                                                                                            |
| Irene                             | Watpool      |                       | BScN, RN         | Ottawa General Hospital | Ottawa, Ontario, Canada                  | Research Coordinator                                    |                                                                                            |
| Wendy                             | Aikens       |                       | RPhT             | Ottawa General Hospital | Ottawa, Ontario, Canada                  | Pharmacy                                                |                                                                                            |
| Anne-Marie                        | Dugal        |                       | RPhT             | Ottawa General Hospital | Ottawa, Ontario, Canada                  | Pharmacy                                                |                                                                                            |
| Susan                             | Fetzer       |                       | RPhT             | Ottawa General Hospital | Ottawa, Ontario, Canada                  | Pharmacy                                                |                                                                                            |
| Deborah                           | Cook         |                       | MD               | St. Joseph's Healthcare | Hamilton, Ontario, Canada                | Site Investigator                                       |                                                                                            |
| Erick                             | Duan         |                       | MD               | St. Joseph's Healthcare | Hamilton, Ontario, Canada                | Site Co-Investigator                                    |                                                                                            |
| Mark                              | Soth         |                       | MD               | St. Joseph's Healthcare | Hamilton, Ontario, Canada                | Site Co-Investigator                                    |                                                                                            |
| Waleed                            | Alhazanni    |                       | MD               | St. Joseph's Healthcare | Hamilton, Ontario, Canada                | Site Co-Investigator                                    |                                                                                            |
| France                            | Clarke       |                       | RRT              | St. Joseph's Healthcare | Hamilton, Ontario, Canada                | Research Coordinator                                    |                                                                                            |
| Mary                              | Copland      |                       | BSc              | St. Joseph's Healthcare | Hamilton, Ontario, Canada                | Research Coordinator                                    |                                                                                            |
| Neala                             | Hoad         |                       | RN               | St. Joseph's Healthcare | Hamilton, Ontario, Canada                | Research Coordinator                                    |                                                                                            |
| Marnie                            | Jakab        |                       | MD               | St. Joseph's Healthcare | Hamilton, Ontario, Canada                | Research Coordinator                                    |                                                                                            |
| Melissa                           | Sheers       |                       | MD               | St. Joseph's Healthcare | Hamilton, Ontario, Canada                | Research Coordinator                                    |                                                                                            |
| Alyson                            | Takaoka      |                       | MSc              | St. Joseph's Healthcare | Hamilton, Ontario, Canada                | Research Coordinator                                    |                                                                                            |
| Nicole                            | Zytaruk      |                       | RN               | St. Joseph's Healthcare | Hamilton, Ontario, Canada                | Research Coordinator                                    |                                                                                            |
| Christa                           | Connolly     |                       | BSc(Pharm)       | St. Joseph's Healthcare | Hamilton, Ontario, Canada                | Pharmacy                                                |                                                                                            |
| Denise                            | Davis        |                       | RPhT             | St. Joseph's Healthcare | Hamilton, Ontario, Canada                | Pharmacy                                                |                                                                                            |
| Catherine                         | Eaton        |                       | RPhT             | St. Joseph's Healthcare | Hamilton, Ontario, Canada                | Pharmacy                                                |                                                                                            |
| Tracy                             | Gallinas     |                       | BSc(Pharm), RPhT | St. Joseph's Healthcare | Hamilton, Ontario, Canada                | Pharmacy                                                |                                                                                            |
| Jean                              | Lee-Yoo      |                       | BSc(Pharm), RPhT | St. Joseph's Healthcare | Hamilton, Ontario, Canada                | Pharmacy                                                |                                                                                            |
| Connie                            | Lukinuk      |                       | BSc(Pharm), RPhT | St. Joseph's Healthcare | Hamilton, Ontario, Canada                | Pharmacy                                                |                                                                                            |
| Leia                              | Musielak     |                       | PharmD           | St. Joseph's Healthcare | Hamilton, Ontario, Canada                | Pharmacy                                                |                                                                                            |
| Nancy                             | Pavunkovic   |                       | RPhT             | St. Joseph's Healthcare | Hamilton, Ontario, Canada                | Pharmacy                                                |                                                                                            |
| Joy                               | Pelayo       |                       | RPhT             | St. Joseph's Healthcare | Hamilton, Ontario, Canada                | Pharmacy                                                |                                                                                            |
| Kaitlyn                           | Phillips     |                       | RPhT             | St. Joseph's Healthcare | Hamilton, Ontario, Canada                | Pharmacy                                                |                                                                                            |
| Catherine                         | Pracovics    |                       | RPhT             | St. Joseph's Healthcare | Hamilton, Ontario, Canada                | Pharmacy                                                |                                                                                            |
| Julia                             | Raimondo     |                       | PharmD, RPh      | St. Joseph's Healthcare | Hamilton, Ontario, Canada                | Pharmacy                                                |                                                                                            |



\*Indicates required information. Only first name, last name, and suffix will appear in PubMed.

| *First Name and Middle Initial(s) | *Last Name      | *Suffix (eg, Jr, III) | Academic Degrees | Institution                                          | Location (city, state/province, country) | Role or Contribution, eg, chair, principal investigator | Group (if more than 1 Group listed in the byline) and/or Subgroup (eg, Steering Committee) |
|-----------------------------------|-----------------|-----------------------|------------------|------------------------------------------------------|------------------------------------------|---------------------------------------------------------|--------------------------------------------------------------------------------------------|
| Vida                              | Stankus         |                       | PharmD, RPh      | St. Joseph`s Healthcare                              | Hamilton, Ontario, Canada                | Pharmacy                                                |                                                                                            |
| Christine                         | Wallace         |                       | BSc(Pharm), RPh  | St. Joseph`s Healthcare                              | Hamilton, Ontario, Canada                | Pharmacy                                                |                                                                                            |
| Angela                            | Wright          |                       | PharmD, RPh      | St. Joseph`s Healthcare                              | Hamilton, Ontario, Canada                | Pharmacy                                                |                                                                                            |
| Crystal                           | Young           |                       | RPhT             | St. Joseph`s Healthcare                              | Hamilton, Ontario, Canada                | Pharmacy                                                |                                                                                            |
| Rob                               | Cirrone         |                       | MD, FRCPC        | St. Joseph`s Health Center                           | Toronto, Ontario, Canada                 | Site Investigator                                       |                                                                                            |
| Jennie                            | Johnstone       |                       | MD, PhD          | St. Joseph`s Health Center                           | Toronto, Ontario, Canada                 | Site Co-Investigator                                    |                                                                                            |
| Kanthi                            | Kavikondala     |                       | BSc, CCRP        | St. Joseph`s Health Center                           | Toronto, Ontario, Canada                 | Research Coordinator                                    |                                                                                            |
| Axelle                            | Pellerin        | Pellerin              | BA               | St. Joseph`s Health Center                           | Toronto, Ontario, Canada                 | Research Coordinator                                    |                                                                                            |
| Laura                             | Tomat           |                       | MSc, CCRP        | St. Joseph`s Health Center                           | Toronto, Ontario, Canada                 | Research Coordinator                                    |                                                                                            |
| Jeff                              | Carter          |                       | BSc(Pharm)       | St. Joseph`s Health Center                           | Toronto, Ontario, Canada                 | Pharmacy                                                |                                                                                            |
| Jiten                             | Jani            |                       | BSc(Pharm), ACRP | St. Joseph`s Health Center                           | Toronto, Ontario, Canada                 | Pharmacy                                                |                                                                                            |
| Brendan                           | Yaets           |                       | MSc, ACRP        | St. Joseph`s Health Center                           | Toronto, Ontario, Canada                 | Pharmacy                                                |                                                                                            |
| John                              | Marshall        |                       | MD, MSc          | St. Michael`s Hospital                               | Toronto, Ontario, Canada                 | Site Investigator                                       |                                                                                            |
| Jan                               | Friedrich       |                       | MD, MSc          | St. Michael`s Hospital                               | Toronto, Ontario, Canada                 | Site Co-Investigator                                    |                                                                                            |
| Jennifer                          | Hodder          |                       | BScN             | St. Michael`s Hospital                               | Toronto, Ontario, Canada                 | Research Coordinator                                    |                                                                                            |
| Imrana                            | Khalid          |                       | MD               | St. Michael`s Hospital                               | Toronto, Ontario, Canada                 | Research Coordinator                                    |                                                                                            |
| Julie                             | Lee             |                       | BSc              | St. Michael`s Hospital                               | Toronto, Ontario, Canada                 | Research Coordinator                                    |                                                                                            |
| Yoon                              | Lee             |                       | BScN             | St. Michael`s Hospital                               | Toronto, Ontario, Canada                 | Research Coordinator                                    |                                                                                            |
| Kurtis                            | Salway          |                       | MSc              | St. Michael`s Hospital                               | Toronto, Ontario, Canada                 | Research Coordinator                                    |                                                                                            |
| Gyan                              | Sandhu          |                       | BScN             | St. Michael`s Hospital                               | Toronto, Ontario, Canada                 | Research Coordinator                                    |                                                                                            |
| Marlene                           | Santos          |                       | MD, MSc          | St. Michael`s Hospital                               | Toronto, Ontario, Canada                 | Research Coordinator                                    |                                                                                            |
| Orla                              | Smith           |                       | PhD              | St. Michael`s Hospital                               | Toronto, Ontario, Canada                 | Research Coordinator                                    |                                                                                            |
| Melissa                           | Wang            |                       | BScN             | St. Michael`s Hospital                               | Toronto, Ontario, Canada                 | Research Coordinator                                    |                                                                                            |
| Norman                            | Dewhurst        |                       | PharmD           | St. Michael`s Hospital                               | Toronto, Ontario, Canada                 | Pharmacy                                                |                                                                                            |
| Ann                               | Dowbenka        |                       | RPhT             | St. Michael`s Hospital                               | Toronto, Ontario, Canada                 | Pharmacy                                                |                                                                                            |
| Ann                               | Kosinski        |                       | RPhT             | St. Michael`s Hospital                               | Toronto, Ontario, Canada                 | Pharmacy                                                |                                                                                            |
| Laura                             | Parsons         |                       | RPhT             | St. Michael`s Hospital                               | Toronto, Ontario, Canada                 | Pharmacy                                                |                                                                                            |
| Johanna                           | Proceviat       |                       | BSc(Pharm)       | St. Michael`s Hospital                               | Toronto, Ontario, Canada                 | Pharmacy                                                |                                                                                            |
| Gitana                            | Ramonas         |                       | RPhT             | St. Michael`s Hospital                               | Toronto, Ontario, Canada                 | Pharmacy                                                |                                                                                            |
| Mae                               | Yuen            |                       | BSc(Pharm)       | St. Michael`s Hospital                               | Toronto, Ontario, Canada                 | Pharmacy                                                |                                                                                            |
| Neill                             | Adhikari        |                       | MD MSc           | Sunnybrook Health Science Centre                     | Toronto, Ontario, Canada                 | Site Investigator                                       |                                                                                            |
| Andre                             | Amaral          |                       | MD               | Sunnybrook Health Science Centre                     | Toronto, Ontario, Canada                 | Site Co-Investigator                                    |                                                                                            |
| Brian H                           | Cuthbertson     |                       | MD, FRCPC        | Sunnybrook Health Science Centre                     | Toronto, Ontario, Canada                 | Site Co-Investigator                                    |                                                                                            |
| Rob                               | Fowler          |                       | MD, MS           | Sunnybrook Health Science Centre                     | Toronto, Ontario, Canada                 | Site Co-Investigator                                    |                                                                                            |
| Damon                             | Scales          |                       | MD, PhD          | Sunnybrook Health Science Centre                     | Toronto, Ontario, Canada                 | Site Co-Investigator                                    |                                                                                            |
| Navjot                            | Kaur            |                       | MD               | Sunnybrook Health Science Centre                     | Toronto, Ontario, Canada                 | Research Coordinator                                    |                                                                                            |
| Nicole                            | Marinoff        |                       | RN               | Sunnybrook Health Science Centre                     | Toronto, Ontario, Canada                 | Research Coordinator                                    |                                                                                            |
| Adic                              | Perez           |                       | MD               | Sunnybrook Health Science Centre                     | Toronto, Ontario, Canada                 | Research Coordinator                                    |                                                                                            |
| Jane                              | Wang            |                       | MD               | Sunnybrook Health Science Centre                     | Toronto, Ontario, Canada                 | Research Coordinator                                    |                                                                                            |
| Katrina                           | Hatzifilalithis |                       | RPhT             | Sunnybrook Health Science Centre                     | Toronto, Ontario, Canada                 | Pharmacy                                                |                                                                                            |
| John                              | Iazzetta        |                       | PharmD           | Sunnybrook Health Science Centre                     | Toronto, Ontario, Canada                 | Pharmacy                                                |                                                                                            |
| Chrys                             | Kolos           |                       | RPh              | Sunnybrook Health Science Centre                     | Toronto, Ontario, Canada                 | Pharmacy                                                |                                                                                            |
| Ingrid                            | Quinton         |                       | RPh              | Sunnybrook Health Science Centre                     | Toronto, Ontario, Canada                 | Pharmacy                                                |                                                                                            |
| Margaret                          | Herridge        |                       | MD               | University Health Network - Toronto General Hospital | Toronto, Ontario, Canada                 | Site Investigator                                       |                                                                                            |
| Eyal                              | Golan           |                       | MD, PhD          | University Health Network - Toronto General Hospital | Toronto, Ontario, Canada                 | Site Co-Investigator                                    |                                                                                            |
| John                              | Granton         |                       | MD               | University Health Network - Toronto General Hospital | Toronto, Ontario, Canada                 | Site Co-Investigator                                    |                                                                                            |
| Jaimie                            | Archer          |                       | HBSc             | University Health Network - Toronto General Hospital | Toronto, Ontario, Canada                 | Research Coordinator                                    |                                                                                            |
| Daniel                            | Chen            |                       | HBSc             | University Health Network - Toronto General Hospital | Toronto, Ontario, Canada                 | Research Coordinator                                    |                                                                                            |
| Brooke                            | Fraser          |                       | MD               | University Health Network - Toronto General Hospital | Toronto, Ontario, Canada                 | Research Coordinator                                    |                                                                                            |
| Cheryl                            | Geen-Smith      |                       | BScN             | University Health Network - Toronto General Hospital | Toronto, Ontario, Canada                 | Research Coordinator                                    |                                                                                            |
| Andrea                            | Matte           |                       | BSc, RRT         | University Health Network - Toronto General Hospital | Toronto, Ontario, Canada                 | Research Coordinator                                    |                                                                                            |
| Priscilla                         | Robles          |                       | PhD              | University Health Network - Toronto General Hospital | Toronto, Ontario, Canada                 | Research Coordinator                                    |                                                                                            |
| Cristian                          | Urrea           |                       | MD               | University Health Network - Toronto General Hospital | Toronto, Ontario, Canada                 | Research Coordinator                                    |                                                                                            |
| Jane                              | Ascroft         |                       | PharmD           | University Health Network - Toronto General Hospital | Toronto, Ontario, Canada                 | Pharmacy                                                |                                                                                            |
| Fatima                            | Haji            |                       | BSc(Pharm)       | University Health Network - Toronto General Hospital | Toronto, Ontario, Canada                 | Pharmacy                                                |                                                                                            |
| Jie                               | Ming            |                       | RPhT             | University Health Network - Toronto General Hospital | Toronto, Ontario, Canada                 | Pharmacy                                                |                                                                                            |

\*Indicates required information. Only first name, last name, and suffix will appear in PubMed.

| *First Name and Middle Initial(s) | *Last Name          | *Suffix (eg, Jr, III) | Academic Degrees | Institution                                          | Location (city, state/province, country) | Role or Contribution, eg, chair, principal investigator | Group (if more than 1 Group listed in the byline) and/or Subgroup (eg, Steering Committee) |
|-----------------------------------|---------------------|-----------------------|------------------|------------------------------------------------------|------------------------------------------|---------------------------------------------------------|--------------------------------------------------------------------------------------------|
| Matthew                           | Suen                |                       | RPhT             | University Health Network - Toronto General Hospital | Toronto, Ontario, Canada                 | Pharmacy                                                |                                                                                            |
| Muhammad                          | Walid               |                       | RPhT             | University Health Network - Toronto General Hospital | Toronto, Ontario, Canada                 | Pharmacy                                                |                                                                                            |
| Jill                              | Westlund            |                       | BSc(Pharm)       | University Health Network - Toronto General Hospital | Toronto, Ontario, Canada                 | Pharmacy                                                |                                                                                            |
| Margaret                          | Herridge            |                       | MD               | University Health Network - Toronto WesternHospital  | Toronto, Ontario, Canada                 | Site Investigator                                       |                                                                                            |
| Alberto                           | Goffi               |                       | MD               | University Health Network - Toronto WesternHospital  | Toronto, Ontario, Canada                 | Site Co-Investigator                                    |                                                                                            |
| Eyal                              | Golan               |                       | MD, PhD          | University Health Network - Toronto WesternHospital  | Toronto, Ontario, Canada                 | Site Co-Investigator                                    |                                                                                            |
| John                              | Granton             |                       | MD               | University Health Network - Toronto WesternHospital  | Toronto, Ontario, Canada                 | Site Co-Investigator                                    |                                                                                            |
| Victoria                          | McCredie            |                       | MD               | University Health Network - Toronto WesternHospital  | Toronto, Ontario, Canada                 | Site Co-Investigator                                    |                                                                                            |
| Elizabeth                         | Wilcox              |                       | MD               | University Health Network - Toronto WesternHospital  | Toronto, Ontario, Canada                 | Site Co-Investigator                                    |                                                                                            |
| Jaimie                            | Archer              |                       | HBSc             | University Health Network - Toronto WesternHospital  | Toronto, Ontario, Canada                 | Research Coordinator                                    |                                                                                            |
| Daniel                            | Chen                |                       | HBSc             | University Health Network - Toronto WesternHospital  | Toronto, Ontario, Canada                 | Research Coordinator                                    |                                                                                            |
| Paulina                           | Farias              |                       | BScN             | University Health Network - Toronto WesternHospital  | Toronto, Ontario, Canada                 | Research Coordinator                                    |                                                                                            |
| Brooke                            | Fraser              |                       | MD               | University Health Network - Toronto WesternHospital  | Toronto, Ontario, Canada                 | Research Coordinator                                    |                                                                                            |
| Cheryl                            | Geen-Smith          |                       | BScN             | University Health Network - Toronto WesternHospital  | Toronto, Ontario, Canada                 | Research Coordinator                                    |                                                                                            |
| Barbara                           | Kosky               |                       | BSc              | University Health Network - Toronto WesternHospital  | Toronto, Ontario, Canada                 | Research Coordinator                                    |                                                                                            |
| Andrea                            | Matte               |                       | BSc, RRT         | University Health Network - Toronto WesternHospital  | Toronto, Ontario, Canada                 | Research Coordinator                                    |                                                                                            |
| Christina                         | Pugliese            |                       | MD               | University Health Network - Toronto WesternHospital  | Toronto, Ontario, Canada                 | Research Coordinator                                    |                                                                                            |
| Priscilla                         | Robles              |                       | PhD              | University Health Network - Toronto WesternHospital  | Toronto, Ontario, Canada                 | Research Coordinator                                    |                                                                                            |
| Lia                               | Stenyk              |                       | HBSc             | University Health Network - Toronto WesternHospital  | Toronto, Ontario, Canada                 | Research Coordinator                                    |                                                                                            |
| Cristian                          | Urrea               |                       | MD               | University Health Network - Toronto WesternHospital  | Toronto, Ontario, Canada                 | Research Coordinator                                    |                                                                                            |
| Karolina                          | Walczak             |                       | BA               | University Health Network - Toronto WesternHospital  | Toronto, Ontario, Canada                 | Research Coordinator                                    |                                                                                            |
| Kyung                             | Ae                  |                       |                  | University Health Network - Toronto WesternHospital  | Toronto, Ontario, Canada                 | Pharmacy                                                |                                                                                            |
| Jane                              | Ascroft             |                       | PharmD           | University Health Network - Toronto WesternHospital  | Toronto, Ontario, Canada                 | Pharmacy                                                |                                                                                            |
| Fatima                            | Haji                |                       | BSc(Pharm)       | University Health Network - Toronto WesternHospital  | Toronto, Ontario, Canada                 | Pharmacy                                                |                                                                                            |
| Rajvinder                         | Kaur                |                       | RPhT             | University Health Network - Toronto WesternHospital  | Toronto, Ontario, Canada                 | Pharmacy                                                |                                                                                            |
| Jane                              | Lui                 |                       | BSc(Pharm)       | University Health Network - Toronto WesternHospital  | Toronto, Ontario, Canada                 | Pharmacy                                                |                                                                                            |
| Sophia                            | Mateo               |                       | RPhT             | University Health Network - Toronto WesternHospital  | Toronto, Ontario, Canada                 | Pharmacy                                                |                                                                                            |
| Nga                               | Pham                |                       | RPhT             | University Health Network - Toronto WesternHospital  | Toronto, Ontario, Canada                 | Pharmacy                                                |                                                                                            |
| Tam                               | Pham                |                       | RPhT             | University Health Network - Toronto WesternHospital  | Toronto, Ontario, Canada                 | Pharmacy                                                |                                                                                            |
| Matthew                           | Suen                |                       | RPhT             | University Health Network - Toronto WesternHospital  | Toronto, Ontario, Canada                 | Pharmacy                                                |                                                                                            |
| Sebastien                         | Trop                |                       | MD, PhD          | William Osler Hospital, McKenzie Health              | Brampton, Ontario, Canada                | Site Investigator                                       |                                                                                            |
| Alexandra                         | Binnie              |                       | MD, DPhil        | William Osler Hospital, McKenzie Health              | Brampton, Ontario, Canada                | Site Co-Investigator                                    |                                                                                            |
| Ronald                            | Heslegrave          |                       | MD               | William Osler Hospital, McKenzie Health              | Brampton, Ontario, Canada                | Site Co-Investigator                                    |                                                                                            |
| Zaynab                            | Panchbhaya          |                       | BScN             | William Osler Hospital, McKenzie Health              | Brampton, Ontario, Canada                | Research Coordinator                                    |                                                                                            |
| Kim                               | Sharman             |                       | RPhT             | William Osler Hospital, McKenzie Health              | Brampton, Ontario, Canada                | Pharmacy                                                |                                                                                            |
| Rakhi                             | Goel                |                       | BSc(Pharm)       | William Osler Hospital, McKenzie Health              | Brampton, Ontario, Canada                | Pharmacy                                                |                                                                                            |
| Kim                               | Kozluk              |                       | RPhT             | William Osler Hospital, McKenzie Health              | Brampton, Ontario, Canada                | Pharmacy                                                |                                                                                            |
| Julianne                          | Labelle             |                       | MHA              | William Osler Hospital, McKenzie Health              | Brampton, Ontario, Canada                | Pharmacy                                                |                                                                                            |
| Hina                              | Marsonia            |                       | PharmD           | William Osler Hospital, McKenzie Health              | Brampton, Ontario, Canada                | Pharmacy                                                |                                                                                            |
| Cecillia                          | Scott               |                       | RPhT             | William Osler Hospital, McKenzie Health              | Brampton, Ontario, Canada                | Pharmacy                                                |                                                                                            |
| Martin                            | Girard              |                       | MD, MSc          | Centre hospitalier de Université de Montréal         | Montréal, Quebec, Canada                 | Site Investigator                                       |                                                                                            |
| Pierre                            | Aslanian            |                       | MD               | Centre hospitalier de Université de Montréal         | Montréal, Quebec, Canada                 | Site Co-Investigator                                    |                                                                                            |
| Sylvain                           | Belisle             |                       | MD               | Centre hospitalier de Université de Montréal         | Montréal, Quebec, Canada                 | Site Co-Investigator                                    |                                                                                            |
| François-Martin                   | Carrier             |                       | MD, MSc          | Centre hospitalier de Université de Montréal         | Montréal, Quebec, Canada                 | Site Co-Investigator                                    |                                                                                            |
| Michaël                           | Chassé              |                       | MD, PhD          | Centre hospitalier de Université de Montréal         | Montréal, Quebec, Canada                 | Site Co-Investigator                                    |                                                                                            |
| André                             | Denault             |                       | MD, PhD          | Centre hospitalier de Université de Montréal         | Montréal, Quebec, Canada                 | Site Co-Investigator                                    |                                                                                            |
| Jean-Gilles                       | Guimond             |                       | MD               | Centre hospitalier de Université de Montréal         | Montréal, Quebec, Canada                 | Site Co-Investigator                                    |                                                                                            |
| Antoine                           | Halwagi             |                       | MD               | Centre hospitalier de Université de Montréal         | Montréal, Quebec, Canada                 | Site Co-Investigator                                    |                                                                                            |
| Paul                              | Hébert              |                       | MD, MSc          | Centre hospitalier de Université de Montréal         | Montréal, Quebec, Canada                 | Site Co-Investigator                                    |                                                                                            |
| Christopher                       | Kolan               |                       | MD               | Centre hospitalier de Université de Montréal         | Montréal, Quebec, Canada                 | Site Co-Investigator                                    |                                                                                            |
| Jordi                             | Mancebo             |                       | MD, PhD          | Centre hospitalier de Université de Montréal         | Montréal, Quebec, Canada                 | Site Co-Investigator                                    |                                                                                            |
| Nicholas                          | Robillard           |                       | MD               | Centre hospitalier de Université de Montréal         | Montréal, Quebec, Canada                 | Site Co-Investigator                                    |                                                                                            |
| Fatna                             | Benettaib           |                       | MSc, BSc         | Centre hospitalier de Université de Montréal         | Montréal, Quebec, Canada                 | Research Coordinator                                    |                                                                                            |
| Dounia                            | Boumahni            |                       | BScN, BSc        | Centre hospitalier de Université de Montréal         | Montréal, Quebec, Canada                 | Research Coordinator                                    |                                                                                            |
| Casey                             | Bourdeau Caporuscio |                       | BSc              | Centre hospitalier de Université de Montréal         | Montréal, Quebec, Canada                 | Research Coordinator                                    |                                                                                            |
| Marie-Ève                         | Cantin              |                       | MSc              | Centre hospitalier de Université de Montréal         | Montréal, Quebec, Canada                 | Research Coordinator                                    |                                                                                            |



\*Indicates required information. Only first name, last name, and suffix will appear in PubMed.

| *First Name and Middle Initial(s) | *Last Name         | *Suffix (eg, Jr, III) | Academic Degrees       | Institution                                                  | Location (city, state/province, country) | Role or Contribution, eg, chair, principal investigator | Group (if more than 1 Group listed in the byline) and/or Subgroup (eg, Steering Committee) |
|-----------------------------------|--------------------|-----------------------|------------------------|--------------------------------------------------------------|------------------------------------------|---------------------------------------------------------|--------------------------------------------------------------------------------------------|
| Virginy                           | Côté-Gravel        |                       | BSc                    | Centre hospitalier de Université de Montréal                 | Montréal, Quebec, Canada                 | Research Coordinator                                    |                                                                                            |
| Ali                               | Ghamraoui          |                       | BSc                    | Centre hospitalier de Université de Montréal                 | Montréal, Quebec, Canada                 | Research Coordinator                                    |                                                                                            |
| Martine                           | Lebrasseur         |                       | RN                     | Centre hospitalier de Université de Montréal                 | Montréal, Quebec, Canada                 | Research Coordinator                                    |                                                                                            |
| Lancelot                          | Legendre Courville |                       | BSc                    | Centre hospitalier de Université de Montréal                 | Montréal, Quebec, Canada                 | Research Coordinator                                    |                                                                                            |
| Stéphanie                         | Lorio              |                       | DEC                    | Centre hospitalier de Université de Montréal                 | Montréal, Quebec, Canada                 | Research Coordinator                                    |                                                                                            |
| Maria                             | Trinidad Madrid    |                       | AEC                    | Centre hospitalier de Université de Montréal                 | Montréal, Quebec, Canada                 | Research Coordinator                                    |                                                                                            |
| Nicole                            | Postras            |                       | DESS                   | Centre hospitalier de Université de Montréal                 | Montréal, Quebec, Canada                 | Research Coordinator                                    |                                                                                            |
| Romain                            | Rigal              |                       | PharmD                 | Centre hospitalier de Université de Montréal                 | Montréal, Quebec, Canada                 | Research Coordinator                                    |                                                                                            |
| Maya                              | Salame             |                       | BSc                    | Centre hospitalier de Université de Montréal                 | Montréal, Quebec, Canada                 | Research Coordinator                                    |                                                                                            |
| Valérie                           | Tran               |                       | MSc                    | Centre hospitalier de Université de Montréal                 | Montréal, Quebec, Canada                 | Research Coordinator                                    |                                                                                            |
| Katie                             | Bacon              |                       | DEP                    | Centre hospitalier de Université de Montréal                 | Montréal, Quebec, Canada                 | Pharmacy                                                |                                                                                            |
| Nathalie                          | Boudreau           |                       | MSc, BSc(Pharm)        | Centre hospitalier de Université de Montréal                 | Montréal, Quebec, Canada                 | Pharmacy                                                |                                                                                            |
| Cecilia                           | Carvajal           |                       |                        | Centre hospitalier de Université de Montréal                 | Montréal, Quebec, Canada                 | Pharmacy                                                |                                                                                            |
| Lyne                              | Gauthier           |                       | MSc, BSc(Pharm)        | Centre hospitalier de Université de Montréal                 | Montréal, Quebec, Canada                 | Pharmacy                                                |                                                                                            |
| Julie                             | Gendron            |                       | BSc                    | Centre hospitalier de Université de Montréal                 | Montréal, Quebec, Canada                 | Pharmacy                                                |                                                                                            |
| Karine                            | Jean               |                       |                        | Centre hospitalier de Université de Montréal                 | Montréal, Quebec, Canada                 | Pharmacy                                                |                                                                                            |
| Louise                            | Laforest           |                       | MSc, BSc(Pharm)        | Centre hospitalier de Université de Montréal                 | Montréal, Quebec, Canada                 | Pharmacy                                                |                                                                                            |
| Antonietta                        | Lembo              |                       |                        | Centre hospitalier de Université de Montréal                 | Montréal, Quebec, Canada                 | Pharmacy                                                |                                                                                            |
| Sothun                            | Lim                |                       | BSc(Pharm)             | Centre hospitalier de Université de Montréal                 | Montréal, Quebec, Canada                 | Pharmacy                                                |                                                                                            |
| Jennifer                          | Morrisette         |                       | DEP                    | Centre hospitalier de Université de Montréal                 | Montréal, Quebec, Canada                 | Pharmacy                                                |                                                                                            |
| France                            | Pagé               |                       |                        | Centre hospitalier de Université de Montréal                 | Montréal, Quebec, Canada                 | Pharmacy                                                |                                                                                            |
| Lucie                             | Pelletier          |                       |                        | Centre hospitalier de Université de Montréal                 | Montréal, Quebec, Canada                 | Pharmacy                                                |                                                                                            |
| Marie-Christine                   | Rodrigue           |                       | MSc, BSc(Pharm)        | Centre hospitalier de Université de Montréal                 | Montréal, Quebec, Canada                 | Pharmacy                                                |                                                                                            |
| Patrick                           | Archambault        |                       | MD, MSc                | Centre intégré de santé et de services sociaux de Chaudière  | Lévis, Quebec, Canada                    | Site Investigator                                       |                                                                                            |
| Jean-François                     | Bellemare          |                       | MD                     | Centre intégré de santé et de services sociaux de Chaudière  | Lévis, Quebec, Canada                    | Site Co-Investigator                                    |                                                                                            |
| Simon                             | Bordeleau          |                       | MD                     | Centre intégré de santé et de services sociaux de Chaudière  | Lévis, Quebec, Canada                    | Site Co-Investigator                                    |                                                                                            |
| Christine                         | Drouin             |                       | MD                     | Centre intégré de santé et de services sociaux de Chaudière  | Lévis, Quebec, Canada                    | Site Co-Investigator                                    |                                                                                            |
| Benoit                            | Duhaime            |                       | MD                     | Centre intégré de santé et de services sociaux de Chaudière  | Lévis, Quebec, Canada                    | Site Co-Investigator                                    |                                                                                            |
| Ann                               | Laberge            |                       | MD, MBA                | Centre intégré de santé et de services sociaux de Chaudière  | Lévis, Quebec, Canada                    | Site Co-Investigator                                    |                                                                                            |
| Philippe                          | Lechance           |                       | MD, MSc                | Centre intégré de santé et de services sociaux de Chaudière  | Lévis, Quebec, Canada                    | Site Co-Investigator                                    |                                                                                            |
| Estel                             | Deblois            |                       | BSc Inf                | Centre intégré de santé et de services sociaux de Chaudière  | Lévis, Quebec, Canada                    | Research Coordinator                                    |                                                                                            |
| Maude                             | Dionne             |                       | MSc                    | Centre intégré de santé et de services sociaux de Chaudière  | Lévis, Quebec, Canada                    | Research Coordinator                                    |                                                                                            |
| Lise                              | Lavoie             |                       | DEC (diplôme d'études) | Centre intégré de santé et de services sociaux de Chaudière  | Lévis, Quebec, Canada                    | Research Coordinator                                    |                                                                                            |
| Isabelle                          | Michel             |                       | BSc Inf                | Centre intégré de santé et de services sociaux de Chaudière  | Lévis, Quebec, Canada                    | Research Coordinator                                    |                                                                                            |
| Alexandre                         | Pépin              |                       | BSc                    | Centre intégré de santé et de services sociaux de Chaudière  | Lévis, Quebec, Canada                    | Research Coordinator                                    |                                                                                            |
| Sandrine                          | Poulin             |                       | BA                     | Centre intégré de santé et de services sociaux de Chaudière  | Lévis, Quebec, Canada                    | Research Coordinator                                    |                                                                                            |
| Sarah                             | Anctil             |                       | MSc                    | Centre intégré de santé et de services sociaux de Chaudière  | Lévis, Quebec, Canada                    | Pharmacy                                                |                                                                                            |
| Louis-Étienne                     | Marchand           |                       | MSc                    | Centre intégré de santé et de services sociaux de Chaudière  | Lévis, Quebec, Canada                    | Pharmacy                                                |                                                                                            |
| Robin                             | Roy                |                       | BSc                    | Centre intégré de santé et de services sociaux de Chaudière  | Lévis, Quebec, Canada                    | Intensive Care Unit                                     |                                                                                            |
| François                          | Lamontagne         |                       | MD                     | Centre intégré universitaire de santé et de services sociaux | Sherbrooke, Quebec, Canada               | Site Investigator                                       |                                                                                            |
| Charles                           | St-Arnaud          |                       | MD                     | Centre intégré universitaire de santé et de services sociaux | Sherbrooke, Quebec, Canada               | Site Co-Investigator                                    |                                                                                            |
| Frédéric                          | D'Aragon           |                       | MD                     | Centre intégré universitaire de santé et de services sociaux | Sherbrooke, Quebec, Canada               | Site Co-Investigator                                    |                                                                                            |
| Hector                            | Quiroz             |                       | MD                     | Centre intégré universitaire de santé et de services sociaux | Sherbrooke, Quebec, Canada               | Site Co-Investigator                                    |                                                                                            |
| Dominique                         | Bérard             |                       | MD                     | Centre intégré universitaire de santé et de services sociaux | Sherbrooke, Quebec, Canada               | Site Co-Investigator                                    |                                                                                            |
| Marc-Andre                        | Léclair            |                       | MD                     | Centre intégré universitaire de santé et de services sociaux | Sherbrooke, Quebec, Canada               | Site Co-Investigator                                    |                                                                                            |
| Virginie                          | Bolduc             |                       | RN                     | Centre intégré universitaire de santé et de services sociaux | Sherbrooke, Quebec, Canada               | Research Coordinator                                    |                                                                                            |
| Elaine                            | Carbonneau         |                       | RN                     | Centre intégré universitaire de santé et de services sociaux | Sherbrooke, Quebec, Canada               | Research Coordinator                                    |                                                                                            |
| Joannie                           | Marchand           |                       |                        | Centre intégré universitaire de santé et de services sociaux | Sherbrooke, Quebec, Canada               | Research Coordinator                                    |                                                                                            |
| Marie-Hélène                      | Masse              |                       | MSc                    | Centre intégré universitaire de santé et de services sociaux | Sherbrooke, Quebec, Canada               | Research Coordinator                                    |                                                                                            |
| Sylvie                            | Cloutier           |                       | MSc                    | Centre intégré universitaire de santé et de services sociaux | Sherbrooke, Quebec, Canada               | Pharmacy                                                |                                                                                            |
| Marianne                          | Guay               |                       | MSc                    | Centre intégré universitaire de santé et de services sociaux | Sherbrooke, Quebec, Canada               | Pharmacy                                                |                                                                                            |
| Line                              | Morin              |                       |                        | Centre intégré universitaire de santé et de services sociaux | Sherbrooke, Quebec, Canada               | Pharmacy                                                |                                                                                            |
| Jessie                            | Nicolson           |                       |                        | Centre intégré universitaire de santé et de services sociaux | Sherbrooke, Quebec, Canada               | Pharmacy                                                |                                                                                            |
| Isabelle                          | Paquette           |                       |                        | Centre intégré universitaire de santé et de services sociaux | Sherbrooke, Quebec, Canada               | Pharmacy                                                |                                                                                            |
| France                            | Théberge           |                       |                        | Centre intégré universitaire de santé et de services sociaux | Sherbrooke, Quebec, Canada               | Pharmacy                                                |                                                                                            |
| François                          | Lamontagne         |                       | MD                     | Centre intégré universitaire de santé et de services sociaux | Sherbrooke, Quebec, Canada               | Site Investigator                                       |                                                                                            |

\*Indicates required information. Only first name, last name, and suffix will appear in PubMed.

| *First Name and Middle Initial(s) | *Last Name      | *Suffix (eg, Jr, III) | Academic Degrees | Institution                                                  | Location (city, state/province, country) | Role or Contribution, eg, chair, principal investigator | Group (if more than 1 Group listed in the byline) and/or Subgroup (eg, Steering Committee) |
|-----------------------------------|-----------------|-----------------------|------------------|--------------------------------------------------------------|------------------------------------------|---------------------------------------------------------|--------------------------------------------------------------------------------------------|
| Charles                           | St-Arnaud       |                       | MD               | Centre intégré universitaire de santé et de services sociaux | Sherbrooke, Quebec, Canada               | Site Co-Investigator                                    |                                                                                            |
| Frédéric                          | D'Aragon        |                       | MD               | Centre intégré universitaire de santé et de services sociaux | Sherbrooke, Quebec, Canada               | Site Co-Investigator                                    |                                                                                            |
| Hector                            | Quiroz          |                       | MD               | Centre intégré universitaire de santé et de services sociaux | Sherbrooke, Quebec, Canada               | Site Co-Investigator                                    |                                                                                            |
| Dominique                         | Bérard          |                       | MD               | Centre intégré universitaire de santé et de services sociaux | Sherbrooke, Quebec, Canada               | Site Co-Investigator                                    |                                                                                            |
| Marc-Andre                        | Léclair         |                       | MD               | Centre intégré universitaire de santé et de services sociaux | Sherbrooke, Quebec, Canada               | Site Co-Investigator                                    |                                                                                            |
| Virginie                          | Bolduc          |                       | RN               | Centre intégré universitaire de santé et de services sociaux | Sherbrooke, Quebec, Canada               | Research Coordinator                                    |                                                                                            |
| Elaine                            | Carbonneau      |                       | RN               | Centre intégré universitaire de santé et de services sociaux | Sherbrooke, Quebec, Canada               | Research Coordinator                                    |                                                                                            |
| Joannie                           | Marchand        |                       |                  | Centre intégré universitaire de santé et de services sociaux | Sherbrooke, Quebec, Canada               | Research Coordinator                                    |                                                                                            |
| Marie-Hélène                      | Masse           |                       | MSc              | Centre intégré universitaire de santé et de services sociaux | Sherbrooke, Quebec, Canada               | Research Coordinator                                    |                                                                                            |
| Sylvie                            | Cloutier        |                       | MSc              | Centre intégré universitaire de santé et de services sociaux | Sherbrooke, Quebec, Canada               | Pharmacy                                                |                                                                                            |
| Marianne                          | Guay            |                       | MSc              | Centre intégré universitaire de santé et de services sociaux | Sherbrooke, Quebec, Canada               | Pharmacy                                                |                                                                                            |
| Line                              | Morin           |                       |                  | Centre intégré universitaire de santé et de services sociaux | Sherbrooke, Quebec, Canada               | Pharmacy                                                |                                                                                            |
| Jessie                            | Nicolson        |                       |                  | Centre intégré universitaire de santé et de services sociaux | Sherbrooke, Quebec, Canada               | Pharmacy                                                |                                                                                            |
| Isabelle                          | Paquette        |                       |                  | Centre intégré universitaire de santé et de services sociaux | Sherbrooke, Quebec, Canada               | Pharmacy                                                |                                                                                            |
| France                            | Théberge        |                       |                  | Centre intégré universitaire de santé et de services sociaux | Sherbrooke, Quebec, Canada               | Pharmacy                                                |                                                                                            |
| Emmanuel                          | Charbonney      |                       | MD, PhD          | Centre intégré universitaire de santé et de services sociaux | Montréal, Quebec, Canada                 | Site Investigator                                       |                                                                                            |
| Yoan                              | Lamarche        |                       | MD               | Centre intégré universitaire de santé et de services sociaux | Montréal, Quebec, Canada                 | Site Co-Investigator                                    |                                                                                            |
| Soazig                            | Leguillan       |                       | MD               | Centre intégré universitaire de santé et de services sociaux | Montréal, Quebec, Canada                 | Site Co-Investigator                                    |                                                                                            |
| Karim                             | Serri           |                       | MD               | Centre intégré universitaire de santé et de services sociaux | Montréal, Quebec, Canada                 | Site Co-Investigator                                    |                                                                                            |
| Colin                             | Verdant         |                       | MD               | Centre intégré universitaire de santé et de services sociaux | Montréal, Quebec, Canada                 | Site Co-Investigator                                    |                                                                                            |
| Yanick                            | Beaulieu        |                       | MD               | Centre intégré universitaire de santé et de services sociaux | Montréal, Quebec, Canada                 | Site Co-Investigator                                    |                                                                                            |
| Patrick                           | Bellemare       |                       | MD               | Centre intégré universitaire de santé et de services sociaux | Montréal, Quebec, Canada                 | Site Co-Investigator                                    |                                                                                            |
| Philippe                          | Rico            |                       | MD               | Centre intégré universitaire de santé et de services sociaux | Montréal, Quebec, Canada                 | Site Co-Investigator                                    |                                                                                            |
| Francis                           | Bernard         |                       | MD               | Centre intégré universitaire de santé et de services sociaux | Montréal, Quebec, Canada                 | Site Co-Investigator                                    |                                                                                            |
| Marc                              | Giasson         |                       | MD               | Centre intégré universitaire de santé et de services sociaux | Montréal, Quebec, Canada                 | Site Co-Investigator                                    |                                                                                            |
| Véronique                         | Brunette        |                       | MD               | Centre intégré universitaire de santé et de services sociaux | Montréal, Quebec, Canada                 | Site Co-Investigator                                    |                                                                                            |
| Alexandros                        | Cavayas         |                       | MD, MSc          | Centre intégré universitaire de santé et de services sociaux | Montréal, Quebec, Canada                 | Site Co-Investigator                                    |                                                                                            |
| Émilie                            | Lévesque        |                       | MD               | Centre intégré universitaire de santé et de services sociaux | Montréal, Quebec, Canada                 | Site Co-Investigator                                    |                                                                                            |
| Halina                            | Labikova        |                       | BSc              | Centre intégré universitaire de santé et de services sociaux | Montréal, Quebec, Canada                 | Research Coordinator                                    |                                                                                            |
| Julia                             | Lainer Palacios |                       | MSc              | Centre intégré universitaire de santé et de services sociaux | Montréal, Quebec, Canada                 | Research Coordinator                                    |                                                                                            |
| Marie-Ève                         | Langlois        |                       | MSc              | Centre intégré universitaire de santé et de services sociaux | Montréal, Quebec, Canada                 | Research Coordinator                                    |                                                                                            |
| Virginie                          | Williams        |                       | PhD              | Centre intégré universitaire de santé et de services sociaux | Montréal, Quebec, Canada                 | Research Coordinator                                    |                                                                                            |
| Thuy Anh                          | Nguyen          |                       | MSc, B.Pharm     | Centre intégré universitaire de santé et de services sociaux | Montréal, Quebec, Canada                 | Pharmacy                                                |                                                                                            |
| Valérie                           | Phaneuf         |                       | B.Pharm, MSc     | Centre intégré universitaire de santé et de services sociaux | Montréal, Quebec, Canada                 | Pharmacy                                                |                                                                                            |
| David                             | Williamson      |                       | PhD, B.Pharm     | Centre intégré universitaire de santé et de services sociaux | Montréal, Quebec, Canada                 | Pharmacy                                                |                                                                                            |
| François                          | Marquis         |                       | MD, MA           | Centre intégré universitaire de santé et de services sociaux | Montréal, Quebec, Canada                 | Site Investigator                                       |                                                                                            |
| Han                               | Tin Wang        |                       | MD, MSc          | Centre intégré universitaire de santé et de services sociaux | Montréal, Quebec, Canada                 | Site Co-Investigator                                    |                                                                                            |
| Francis                           | Toupin          |                       | MD, MMed, FRCPC  | Centre intégré universitaire de santé et de services sociaux | Montréal, Quebec, Canada                 | Site Co-Investigator                                    |                                                                                            |
| Stephane                          | Ahern           |                       | MD, MA, PhD      | Centre intégré universitaire de santé et de services sociaux | Montréal, Quebec, Canada                 | Site Co-Investigator                                    |                                                                                            |
| Brian                             | Laufer          |                       | MD               | Centre intégré universitaire de santé et de services sociaux | Montréal, Quebec, Canada                 | Site Co-Investigator                                    |                                                                                            |
| Marc                              | Brosseau        |                       | MD               | Centre intégré universitaire de santé et de services sociaux | Montréal, Quebec, Canada                 | Site Co-Investigator                                    |                                                                                            |
| Pauline                           | Dul             |                       |                  | Centre intégré universitaire de santé et de services sociaux | Montréal, Quebec, Canada                 | Research Coordinator                                    |                                                                                            |
| Johanne                           | Harvey          |                       | RN               | Centre intégré universitaire de santé et de services sociaux | Montréal, Quebec, Canada                 | Research Coordinator                                    |                                                                                            |
| Lotthida                          | Inthanavong     |                       | MSc              | Centre intégré universitaire de santé et de services sociaux | Montréal, Quebec, Canada                 | Research Coordinator                                    |                                                                                            |
| Danae                             | Tassy           |                       | PhD, RN          | Centre intégré universitaire de santé et de services sociaux | Montréal, Quebec, Canada                 | Research Coordinator                                    |                                                                                            |
| Helen                             | Assayag         |                       | MSc(Pharm)       | Centre intégré universitaire de santé et de services sociaux | Montréal, Quebec, Canada                 | Pharmacy                                                |                                                                                            |
| Maude                             | Bachand         |                       | MSc(Pharm)       | Centre intégré universitaire de santé et de services sociaux | Montréal, Quebec, Canada                 | Pharmacy                                                |                                                                                            |
| Marysa                            | Betournay       |                       | PA               | Centre intégré universitaire de santé et de services sociaux | Montréal, Quebec, Canada                 | Pharmacy                                                |                                                                                            |
| Karine                            | Daoust          |                       | MSc(Pharm)       | Centre intégré universitaire de santé et de services sociaux | Montréal, Quebec, Canada                 | Pharmacy                                                |                                                                                            |
| Kristine                          | Goyette         |                       | MSc(Pharm)       | Centre intégré universitaire de santé et de services sociaux | Montréal, Quebec, Canada                 | Pharmacy                                                |                                                                                            |
| Ariane                            | Lessard         |                       | MSc(Pharm)       | Centre intégré universitaire de santé et de services sociaux | Montréal, Quebec, Canada                 | Pharmacy                                                |                                                                                            |
| Marceline                         | Quach           |                       | MSc(Pharm)       | Centre intégré universitaire de santé et de services sociaux | Montréal, Quebec, Canada                 | Pharmacy                                                |                                                                                            |
| François                          | Lauzier         |                       | MD, MSc, FRCPC   | CHU de Québec-Université Laval (Hôpital de l'Enfant-Jésus)   | Québec City, Quebec, Canada              | Site Investigator                                       |                                                                                            |
| Alexis                            | Turgeon         |                       | MD, MSc, FRCPC   | CHU de Québec-Université Laval (Hôpital de l'Enfant-Jésus)   | Québec City, Quebec, Canada              | Site Co-Investigator                                    |                                                                                            |
| Danny                             | Barriault       |                       | MD               | CHU de Québec-Université Laval (Hôpital de l'Enfant-Jésus)   | Québec City, Quebec, Canada              | Research Coordinator                                    |                                                                                            |
| David                             | Bellemare       |                       | MSc, RN          | CHU de Québec-Université Laval (Hôpital de l'Enfant-Jésus)   | Québec City, Quebec, Canada              | Research Coordinator                                    |                                                                                            |
| Anick                             | Boivin          |                       | BSc, RN          | CHU de Québec-Université Laval (Hôpital de l'Enfant-Jésus)   | Québec City, Quebec, Canada              | Research Coordinator                                    |                                                                                            |

\*Indicates required information. Only first name, last name, and suffix will appear in PubMed.

| *First Name and Middle Initial(s) | *Last Name        | *Suffix (eg, Jr, III) | Academic Degrees | Institution                                                 | Location (city, state/province, country) | Role or Contribution, eg, chair, principal investigator | Group (if more than 1 Group listed in the byline) and/or Subgroup (eg, Steering Committee) |
|-----------------------------------|-------------------|-----------------------|------------------|-------------------------------------------------------------|------------------------------------------|---------------------------------------------------------|--------------------------------------------------------------------------------------------|
| Sarah-Judith                      | Breton            |                       | MSc, RN          | CHU de Québec-Université Laval (Hôpital de l'Enfant-Jésus)  | Québec City, Quebec, Canada              | Research Coordinator                                    |                                                                                            |
| Ève                               | Cloutier          |                       |                  | CHU de Québec-Université Laval (Hôpital de l'Enfant-Jésus)  | Québec City, Quebec, Canada              | Research Coordinator                                    |                                                                                            |
| Marjorie                          | Daigle            |                       |                  | CHU de Québec-Université Laval (Hôpital de l'Enfant-Jésus)  | Québec City, Quebec, Canada              | Research Coordinator                                    |                                                                                            |
| Charles                           | Delisle-Thibeault |                       | BSc RN           | CHU de Québec-Université Laval (Hôpital de l'Enfant-Jésus)  | Québec City, Quebec, Canada              | Research Coordinator                                    |                                                                                            |
| Panagiota                         | Giannakouros      |                       | BSc              | CHU de Québec-Université Laval (Hôpital de l'Enfant-Jésus)  | Québec City, Quebec, Canada              | Research Coordinator                                    |                                                                                            |
| Stéphanie                         | Grenier           |                       | BSc, RN          | CHU de Québec-Université Laval (Hôpital de l'Enfant-Jésus)  | Québec City, Quebec, Canada              | Research Coordinator                                    |                                                                                            |
| Gabrielle                         | Guilbault         |                       |                  | CHU de Québec-Université Laval (Hôpital de l'Enfant-Jésus)  | Québec City, Quebec, Canada              | Research Coordinator                                    |                                                                                            |
| Caroline                          | Léger             |                       | PhD              | CHU de Québec-Université Laval (Hôpital de l'Enfant-Jésus)  | Québec City, Quebec, Canada              | Research Coordinator                                    |                                                                                            |
| Catherine                         | Ouellet           |                       | MSc              | CHU de Québec-Université Laval (Hôpital de l'Enfant-Jésus)  | Québec City, Quebec, Canada              | Research Coordinator                                    |                                                                                            |
| Marie-Claude                      | Trembley          |                       | BSc, Rn          | CHU de Québec-Université Laval (Hôpital de l'Enfant-Jésus)  | Québec City, Quebec, Canada              | Research Coordinator                                    |                                                                                            |
| Julie                             | Gaudreau          |                       | MSc, BSc(Pharm)  | CHU de Québec-Université Laval (Hôpital de l'Enfant-Jésus)  | Québec City, Quebec, Canada              | Pharmacy                                                |                                                                                            |
| Claire                            | Grégoire          |                       | MSc, BSc(Pharm)  | CHU de Québec-Université Laval (Hôpital de l'Enfant-Jésus)  | Québec City, Quebec, Canada              | Pharmacy                                                |                                                                                            |
| Véronique                         | Labbé             |                       | MSc, BSc(Pharm)  | CHU de Québec-Université Laval (Hôpital de l'Enfant-Jésus)  | Québec City, Quebec, Canada              | Pharmacy                                                |                                                                                            |
| Ariane                            | Laprise-Rochette  |                       | MSc, BSc(Pharm)  | CHU de Québec-Université Laval (Hôpital de l'Enfant-Jésus)  | Québec City, Quebec, Canada              | Pharmacy                                                |                                                                                            |
| Caroline                          | Ouellet           |                       | MSc              | CHU de Québec-Université Laval (Hôpital de l'Enfant-Jésus)  | Québec City, Quebec, Canada              | Pharmacy                                                |                                                                                            |
| Mélanie                           | Samson            |                       | BSc(Pharm)       | CHU de Québec-Université Laval (Hôpital de l'Enfant-Jésus)  | Québec City, Quebec, Canada              | Pharmacy                                                |                                                                                            |
| Marie-David                       | Simoneau          |                       | MSc, BSc(Pharm)  | CHU de Québec-Université Laval (Hôpital de l'Enfant-Jésus)  | Québec City, Quebec, Canada              | Pharmacy                                                |                                                                                            |
| Virginie                          | Tourcotte         |                       | MSc, BSc(Pharm)  | CHU de Québec-Université Laval (Hôpital de l'Enfant-Jésus)  | Québec City, Quebec, Canada              | Pharmacy                                                |                                                                                            |
| Tuong-Vi                          | Tran              |                       | MSc, BSc(Pharm)  | CHU de Québec-Université Laval (Hôpital de l'Enfant-Jésus)  | Québec City, Quebec, Canada              | Pharmacy                                                |                                                                                            |
| François                          | Lellouche         |                       | MD, PhD          | Institut Universitaire de Cardiologie et de Pneumologie de  | Québec City, Quebec, Canada              | Site Investigator                                       |                                                                                            |
| Ying                              | Tung Sia          |                       | MD, FRCPC        | Institut Universitaire de Cardiologie et de Pneumologie de  | Québec City, Quebec, Canada              | Site Co-Investigator                                    |                                                                                            |
| Mathieu                           | Simon             |                       | MD, FRCPC        | Institut Universitaire de Cardiologie et de Pneumologie de  | Québec City, Quebec, Canada              | Site Co-Investigator                                    |                                                                                            |
| Pierre-Alexandre                  | Bouchard          |                       | RRT              | Institut Universitaire de Cardiologie et de Pneumologie de  | Québec City, Quebec, Canada              | Research Coordinator                                    |                                                                                            |
| Patricia                          | Lizotte           |                       | RN               | Institut Universitaire de Cardiologie et de Pneumologie de  | Québec City, Quebec, Canada              | Research Coordinator                                    |                                                                                            |
| Nathalie                          | Chateauvert       |                       | BSc(Pharm)       | Institut Universitaire de Cardiologie et de Pneumologie de  | Québec City, Quebec, Canada              | Pharmacy                                                |                                                                                            |
| Thérèse                           | Grenier           |                       |                  | Institut Universitaire de Cardiologie et de Pneumologie de  | Québec City, Quebec, Canada              | Pharmacy                                                |                                                                                            |
| Kosar                             | Khwaja            |                       | MD, FRCPC        | McGill University Health Centre (Montréal General Hospital) | Montréal, Quebec, Canada                 | Site Investigator                                       |                                                                                            |
| Dan                               | Deckelbaum        |                       | MD, FRCPC        | McGill University Health Centre (Montréal General Hospital) | Montréal, Quebec, Canada                 | Site Co-Investigator                                    |                                                                                            |
| Jeremy                            | Grushka           |                       | MD, FRCPC        | McGill University Health Centre (Montréal General Hospital) | Montréal, Quebec, Canada                 | Site Co-Investigator                                    |                                                                                            |
| Ash                               | Gursahaney        |                       | MD, FRCPC        | McGill University Health Centre (Montréal General Hospital) | Montréal, Quebec, Canada                 | Site Co-Investigator                                    |                                                                                            |
| David                             | Hornstein         |                       | MD, FRCPC        | McGill University Health Centre (Montréal General Hospital) | Montréal, Quebec, Canada                 | Site Co-Investigator                                    |                                                                                            |
| Dev                               | Jayaraman         |                       | MD, FRCPC        | McGill University Health Centre (Montréal General Hospital) | Montréal, Quebec, Canada                 | Site Co-Investigator                                    |                                                                                            |
| Tarek                             | Razek             |                       | MD, FRCPC        | McGill University Health Centre (Montréal General Hospital) | Montréal, Quebec, Canada                 | Site Co-Investigator                                    |                                                                                            |
| Robert                            | Salasidis         |                       | MD, FRCPC        | McGill University Health Centre (Montréal General Hospital) | Montréal, Quebec, Canada                 | Site Co-Investigator                                    |                                                                                            |
| Patrizia                          | Zanelli           |                       | MD, FRCPC        | McGill University Health Centre (Montréal General Hospital) | Montréal, Quebec, Canada                 | Site Co-Investigator                                    |                                                                                            |
| Norine                            | Alam              |                       | MD               | McGill University Health Centre (Montréal General Hospital) | Montréal, Quebec, Canada                 | Research Coordinator                                    |                                                                                            |
| Laura                             | Garcia            |                       | RN               | McGill University Health Centre (Montréal General Hospital) | Montréal, Quebec, Canada                 | Research Coordinator                                    |                                                                                            |
| Tonia                             | Doerksen          |                       | PhD, BPharm      | McGill University Health Centre (Montréal General Hospital) | Montréal, Quebec, Canada                 | Pharmacy                                                |                                                                                            |
| Ariane                            | Lessard           |                       | MSc, BPharm      | McGill University Health Centre (Montréal General Hospital) | Montréal, Quebec, Canada                 | Pharmacy                                                |                                                                                            |
| Gilbert                           | Matte             |                       | PhD, MSc, BPharm | McGill University Health Centre (Montréal General Hospital) | Montréal, Quebec, Canada                 | Pharmacy                                                |                                                                                            |
| Marie-France                      | Robert            |                       | MSc              | McGill University Health Centre (Montréal General Hospital) | Montréal, Quebec, Canada                 | Pharmacy                                                |                                                                                            |
| Arnold S                          | Kristof           |                       | MD, FRCPC        | McGill University Health Centre (Royal Victoria Hospital, G | Montréal, Quebec, Canada                 | Site Investigator                                       |                                                                                            |
| Peter                             | Goldberg          |                       | MD, FRCPC        | McGill University Health Centre (Royal Victoria Hospital, G | Montréal, Quebec, Canada                 | Site Co-Investigator                                    |                                                                                            |
| Roupen                            | Hatzakorjian      |                       | MD, FRCPC        | McGill University Health Centre (Royal Victoria Hospital, G | Montréal, Quebec, Canada                 | Site Co-Investigator                                    |                                                                                            |
| Sheldon                           | Magder            |                       | MD, FRCPC        | McGill University Health Centre (Royal Victoria Hospital, G | Montréal, Quebec, Canada                 | Site Co-Investigator                                    |                                                                                            |
| Jason                             | Shahin            |                       | MD, FRCPC        | McGill University Health Centre (Royal Victoria Hospital, G | Montréal, Quebec, Canada                 | Site Co-Investigator                                    |                                                                                            |
| Salman                            | Qureshi           |                       | MD, FRCPC        | McGill University Health Centre (Royal Victoria Hospital, G | Montréal, Quebec, Canada                 | Site Co-Investigator                                    |                                                                                            |
| Josie                             | Campisi           |                       | MSc              | McGill University Health Centre (Royal Victoria Hospital, G | Montréal, Quebec, Canada                 | Research Coordinator                                    |                                                                                            |
| Vasilica                          | Botan             |                       | DEP              | McGill University Health Centre (Royal Victoria Hospital, G | Montréal, Quebec, Canada                 | Pharmacy                                                |                                                                                            |
| Anissa                            | Capilnean         |                       | MSc, BPharm      | McGill University Health Centre (Royal Victoria Hospital, G | Montréal, Quebec, Canada                 | Pharmacy                                                |                                                                                            |
| Alyssa                            | Corey             |                       | DEP              | McGill University Health Centre (Royal Victoria Hospital, G | Montréal, Quebec, Canada                 | Pharmacy                                                |                                                                                            |
| Annick                            | Gagné             |                       | DEP              | McGill University Health Centre (Royal Victoria Hospital, G | Montréal, Quebec, Canada                 | Pharmacy                                                |                                                                                            |
| Jasmine                           | Mian              |                       | BPharm, DPH      | McGill University Health Centre (Royal Victoria Hospital, G | Montréal, Quebec, Canada                 | Pharmacy                                                |                                                                                            |
| Kathleen                          | Normandin         |                       | MSc, BPharm      | McGill University Health Centre (Royal Victoria Hospital, G | Montréal, Quebec, Canada                 | Pharmacy                                                |                                                                                            |
| Osama                             | Loubani           |                       | MD, FRCPC        | Nova Scotia Health Authority QEII                           | Halifax, Nova Scotia, Canada             | Site Investigator                                       |                                                                                            |
| Rick                              | Hall              |                       | MD, FRCPC        | Nova Scotia Health Authority QEII                           | Halifax, Nova Scotia, Canada             | Site Co-Investigator                                    |                                                                                            |

\*Indicates required information. Only first name, last name, and suffix will appear in PubMed.

| *First Name and Middle Initial(s) | *Last Name  | *Suffix (eg, Jr, III) | Academic Degrees | Institution                                                | Location (city, state/province, country)       | Role or Contribution, eg, chair, principal investigator | Group (if more than 1 Group listed in the byline) and/or Subgroup (eg, Steering Committee) |
|-----------------------------------|-------------|-----------------------|------------------|------------------------------------------------------------|------------------------------------------------|---------------------------------------------------------|--------------------------------------------------------------------------------------------|
| Robert                            | Green       |                       | MD, FRCPC        | Nova Scotia Health Authority QEII                          | Halifax, Nova Scotia, Canada                   | Site Co-Investigator                                    |                                                                                            |
| Diana                             | Gillis      |                       | BScN             | Nova Scotia Health Authority QEII                          | Halifax, Nova Scotia, Canada                   | Research Coordinator                                    |                                                                                            |
| Lisa                              | Julien      |                       | BScN             | Nova Scotia Health Authority QEII                          | Halifax, Nova Scotia, Canada                   | Research Coordinator                                    |                                                                                            |
| Laura Lee                         | Magennis    |                       | BN               | Nova Scotia Health Authority QEII                          | Halifax, Nova Scotia, Canada                   | Research Coordinator                                    |                                                                                            |
| Tamara                            | Mitterer    |                       | BScN, BSc        | Nova Scotia Health Authority QEII                          | Halifax, Nova Scotia, Canada                   | Research Coordinator                                    |                                                                                            |
| Joanna                            | Arsenault   |                       | CCRP, PhT        | Nova Scotia Health Authority QEII                          | Halifax, Nova Scotia, Canada                   | Pharmacy                                                |                                                                                            |
| Kim                               | Bruce-Payne |                       | RPhT             | Nova Scotia Health Authority QEII                          | Halifax, Nova Scotia, Canada                   | Pharmacy                                                |                                                                                            |
| Patti                             | Gallant     |                       | CCRP, PhT        | Nova Scotia Health Authority QEII                          | Halifax, Nova Scotia, Canada                   | Pharmacy                                                |                                                                                            |
| Rodrigo                           | Cartin-Ceba |                       | MD               | Mayo Clinic, Rochester                                     | Rochester, Minnesota, United States of America | Site Investigator                                       |                                                                                            |
| Richard                           | Oeckler     |                       | MD, PhD          | Mayo Clinic, Rochester                                     | Rochester, Minnesota, United States of America | Site Co-Investigator                                    |                                                                                            |
| Brenda                            | Anderson    |                       | BScN             | Mayo Clinic, Rochester                                     | Rochester, Minnesota, United States of America | Research Coordinator                                    |                                                                                            |
| Lavonne                           | Liedl       |                       | RRT, LRT         | Mayo Clinic, Rochester                                     | Rochester, Minnesota, United States of America | Research Coordinator                                    |                                                                                            |
| Laurie                            | Meade       |                       | RN, AD           | Mayo Clinic, Rochester                                     | Rochester, Minnesota, United States of America | Research Coordinator                                    |                                                                                            |
| Sueanne                           | Weist       |                       | BScN             | Mayo Clinic, Rochester                                     | Rochester, Minnesota, United States of America | Research Coordinator                                    |                                                                                            |
| Anna                              | Bartoo      |                       | PharmD, RPh      | Mayo Clinic, Rochester                                     | Rochester, Minnesota, United States of America | Pharmacy                                                |                                                                                            |
| Debbie                            | Bauer       |                       | PharmD, RPh      | Mayo Clinic, Rochester                                     | Rochester, Minnesota, United States of America | Pharmacy                                                |                                                                                            |
| Vince                             | Brickley    |                       | PharmD, RPh      | Mayo Clinic, Rochester                                     | Rochester, Minnesota, United States of America | Pharmacy                                                |                                                                                            |
| Shaun                             | Bridges     |                       | RPh              | Mayo Clinic, Rochester                                     | Rochester, Minnesota, United States of America | Pharmacy                                                |                                                                                            |
| Greg                              | Brunn       |                       | DRPh             | Mayo Clinic, Rochester                                     | Rochester, Minnesota, United States of America | Pharmacy                                                |                                                                                            |
| Jennifer                          | Eickstaedt  |                       | DRPh             | Mayo Clinic, Rochester                                     | Rochester, Minnesota, United States of America | Pharmacy                                                |                                                                                            |
| Jill                              | Bergerson   |                       | PharmD, RPh      | Mayo Clinic, Rochester                                     | Rochester, Minnesota, United States of America | Pharmacy                                                |                                                                                            |
| Sandy                             | Showalter   |                       | RPh              | Mayo Clinic, Rochester                                     | Rochester, Minnesota, United States of America | Pharmacy                                                |                                                                                            |
| Erin                              | Stern       |                       | PharmD, RPh      | Mayo Clinic, Rochester                                     | Rochester, Minnesota, United States of America | Pharmacy                                                |                                                                                            |
| Melissa                           | Manley      |                       | PharmD, RPh      | Mayo Clinic, Rochester                                     | Rochester, Minnesota, United States of America | Pharmacy                                                |                                                                                            |
| Robert                            | Taylor      |                       | MD               | St John's Mercy Medical Center                             | St Louis, Missouri, United States of America   | Site Investigator                                       |                                                                                            |
| Margaret                          | Cryton      |                       | BScN             | St John's Mercy Medical Center                             | St Louis, Missouri, United States of America   | Research Coordinator                                    |                                                                                            |
| Kim                               | Fowler      |                       | BScN             | St John's Mercy Medical Center                             | St Louis, Missouri, United States of America   | Research Coordinator                                    |                                                                                            |
| Katie                             | Krause      |                       | RN               | St John's Mercy Medical Center                             | St Louis, Missouri, United States of America   | Research Coordinator                                    |                                                                                            |
| Jackie                            | O'Brien     |                       | BScN             | St John's Mercy Medical Center                             | St Louis, Missouri, United States of America   | Research Coordinator                                    |                                                                                            |
| Marianne                          | Tow         |                       | BScN             | St John's Mercy Medical Center                             | St Louis, Missouri, United States of America   | Research Coordinator                                    |                                                                                            |
| John                              | Ma          |                       | PharmD           | St John's Mercy Medical Center                             | St Louis, Missouri, United States of America   | Pharmacy                                                |                                                                                            |
| Kaitlin MS                        | Moore       |                       | BS               | St John's Mercy Medical Center                             | St Louis, Missouri, United States of America   | Pharmacy                                                |                                                                                            |
| Yaseen                            | Arabi       |                       | MD               | King Saud bin Abdulaziz University for Health Sciences and | Riyadh, Saudi Arabia                           | Site Investigator                                       |                                                                                            |
| Abdulaziz                         | Al-Dawood   |                       | MD               | King Saud bin Abdulaziz University for Health Sciences and | Riyadh, Saudi Arabia                           | Site Co-Investigator                                    |                                                                                            |
| Haytham                           | Tlayjeh     |                       | MD               | King Saud bin Abdulaziz University for Health Sciences and | Riyadh, Saudi Arabia                           | Site Co-Investigator                                    |                                                                                            |
| Alaaeldien                        | Ghanem      |                       | MD               | King Saud bin Abdulaziz University for Health Sciences and | Riyadh, Saudi Arabia                           | Site Co-Investigator                                    |                                                                                            |
| Ahmad                             | Hassanien   |                       | MD               | King Saud bin Abdulaziz University for Health Sciences and | Riyadh, Saudi Arabia                           | Site Co-Investigator                                    |                                                                                            |
| Mohamed                           | Hegazy      |                       | MD               | King Saud bin Abdulaziz University for Health Sciences and | Riyadh, Saudi Arabia                           | Site Co-Investigator                                    |                                                                                            |
| Ashraf                            | El Sharkawi |                       | MD               | King Saud bin Abdulaziz University for Health Sciences and | Riyadh, Saudi Arabia                           | Site Co-Investigator                                    |                                                                                            |
| Felwa                             | Bin Humaid  |                       | BSc              | King Saud bin Abdulaziz University for Health Sciences and | Riyadh, Saudi Arabia                           | Research Coordinator                                    |                                                                                            |
| Hala                              | Alanizi     |                       | RN               | King Saud bin Abdulaziz University for Health Sciences and | Riyadh, Saudi Arabia                           | Research Coordinator                                    |                                                                                            |
| Nadyah                            | Alanizy     |                       | RN               | King Saud bin Abdulaziz University for Health Sciences and | Riyadh, Saudi Arabia                           | Research Coordinator                                    |                                                                                            |
| Njoud                             | Al Bogami   |                       | RN               | King Saud bin Abdulaziz University for Health Sciences and | Riyadh, Saudi Arabia                           | Research Coordinator                                    |                                                                                            |
| Mohammed                          | Muhaidib    |                       | PharmD           | King Saud bin Abdulaziz University for Health Sciences and | Riyadh, Saudi Arabia                           | Pharmacy                                                |                                                                                            |
| Jawaher                           | Gramish     |                       | PharmD           | King Saud bin Abdulaziz University for Health Sciences and | Riyadh, Saudi Arabia                           | Pharmacy                                                |                                                                                            |
| Randa                             | Alsomali    |                       | BSc(Pharm)       | King Saud bin Abdulaziz University for Health Sciences and | Riyadh, Saudi Arabia                           | Pharmacy                                                |                                                                                            |
| Nora                              | Devera      |                       | BSc              | King Saud bin Abdulaziz University for Health Sciences and | Riyadh, Saudi Arabia                           | Pharmacy                                                |                                                                                            |
| Marjane                           | Villafranca |                       | BSc              | King Saud bin Abdulaziz University for Health Sciences and | Riyadh, Saudi Arabia                           | Pharmacy                                                |                                                                                            |
