# Supplementary material
Source: PubMed Central journal article supplement (PMC8456390)
Supplement: jama-e2113355-s004.pdf [file jama-e2113355-s004.pdf]

## Data Sharing Statement

### Data

**Data available:** No

### Additional Information

**Explanation for why data not available:** Data available: Yes Data types: Deidentified participant data Who can access data: Requesters who are employees of an academic institution or health service organization with training and experience in medical research, including peer-review publications indicating their ability to carry out the proposed analysis of the requested dataset. When can data be available: Starting: 01-01-2024 How data will be available: A protocol is required outlining the purpose of the request for data and proposed analysis, which will be reviewed by the PROSPECT Steering Committee. Depending on the scope of the proposed work, it may need to be reviewed by all participating center's respective institutional review boards, as patients and families have not given consent for their data to be held in any location other than their own institution or the PROSPECT Methods Center. After review and approval of the protocol by the PROSPECT Steering Committee and relevant institutional review boards, Requesters will sign a Data Sharing Agreement with McMaster University. This Data Transfer Agreement will outline the individuals and institutions with whom data will be shared, and indicate the format of de-identified data to be shared. Requesters will be unable to identify any individual participant or institution. Linking data with another dataset will require permission from the Steering Committee and McMaster University. Requests for data sharing will be directed to the corresponding author, [debcook@mcmaster.ca](mailto:debcook@mcmaster.ca). Types of data analyses: Data sharing will only be for the purposes of health and medical research and within the constraints of the consent under which the data were originally gathered, including but not limited to secondary analyses of the randomized trial database and individual patient systematic reviews, but not for commercialization purposes. Publications: Proposals for rigorous and relevant analyses of the PROSPECT dataset are welcome by PROSPECT Investigators and Research Coordinators, as outlined in the PROSPECT Publication Guideline. For publications arising from work covered under this Data Sharing Agreement, International Council of Journal of Biology Editor's criteria for authorship will be followed. The PROSPECT Steering Committee will review all manuscripts arising. PROSPECT Investigators and Research Coordinators in each site and the Canadian Critical Care Trials Group will be cited in the Acknowledgements unless agreed upon otherwise.

Costs: Requesters will assume costs related to data files and document preparation, as well as institutional ethics and legal review.

Conflicts of Interest and Funding Sources: Requesters will declare actual or potential conflicts of interest in relation to the dataset to ensure that they do not have a conflict of interest that may influence the proposed work or interpretation of intended analyses. Requesters will declare funding sources for the proposed work, and include this information in in all arising presentations and publications.
